# Supplementary material for: A Synthetic Formula Amino Acid Diet Leads to Microbiome Dysbiosis, Reduced Colon Length, Inflammation, and Altered Locomotor Activity in C57BL/6J Mice
Source: MDPI journal article supplement (doi:10.3390/microorganisms11112694), 2023-11-03
Supplement: s1 [file s1]

# A Synthetic Formula Amino Acid Diet Leads to Microbiome Dysbiosis, Reduced Colon Length, Inflammation, and Altered Locomotor Activity in C57BL/6J Mice

Viviana J. Mancilla<sup>1</sup>, Paige N. Braden-Kuhle<sup>2</sup>, Kelly N. Brice<sup>2</sup>, Allison E. Mann<sup>1,4</sup>, Megan T. Williams<sup>1</sup>, Yan Zhang<sup>1</sup>, Michael J. Chumley<sup>3</sup>, Robert C. Barber<sup>5</sup>, Sabrina N. White<sup>1</sup>, Gary W. Boehm<sup>2\*</sup>, Michael S. Allen<sup>1\*</sup>

\* **Correspondence:** Michael Allen & Gary Boehm  
Michael.Allen@unthsc.edu (M.S.A), g.boehm@tcu.edu (G.W.B)

## 1 Supplementary Figures and Tables

### 1.1 Supplementary Figures

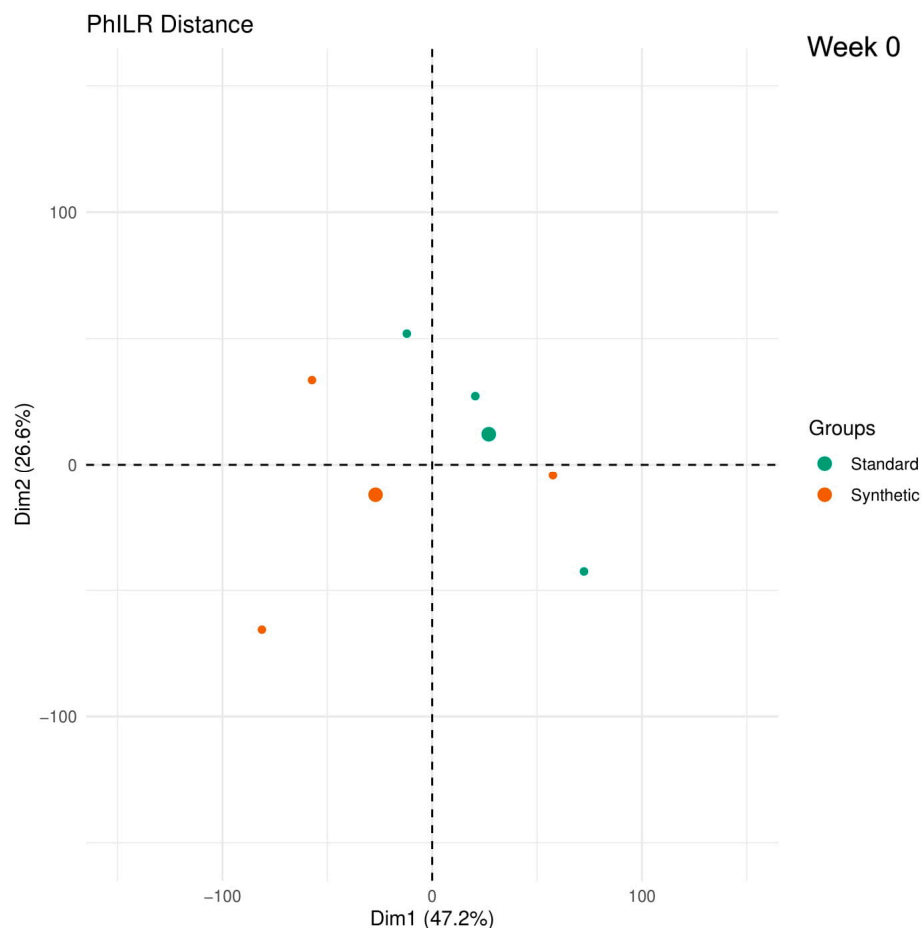

**Supplementary Figure S1.** Principal component analysis (PCA) of PhILR distances for the gut microbiota of synthetic and standard diet animals prior to diet consumption. Fecal samples collected at weaning. Individual samples are represented by one point; larger circles represent the mean coordinates for each diet group.

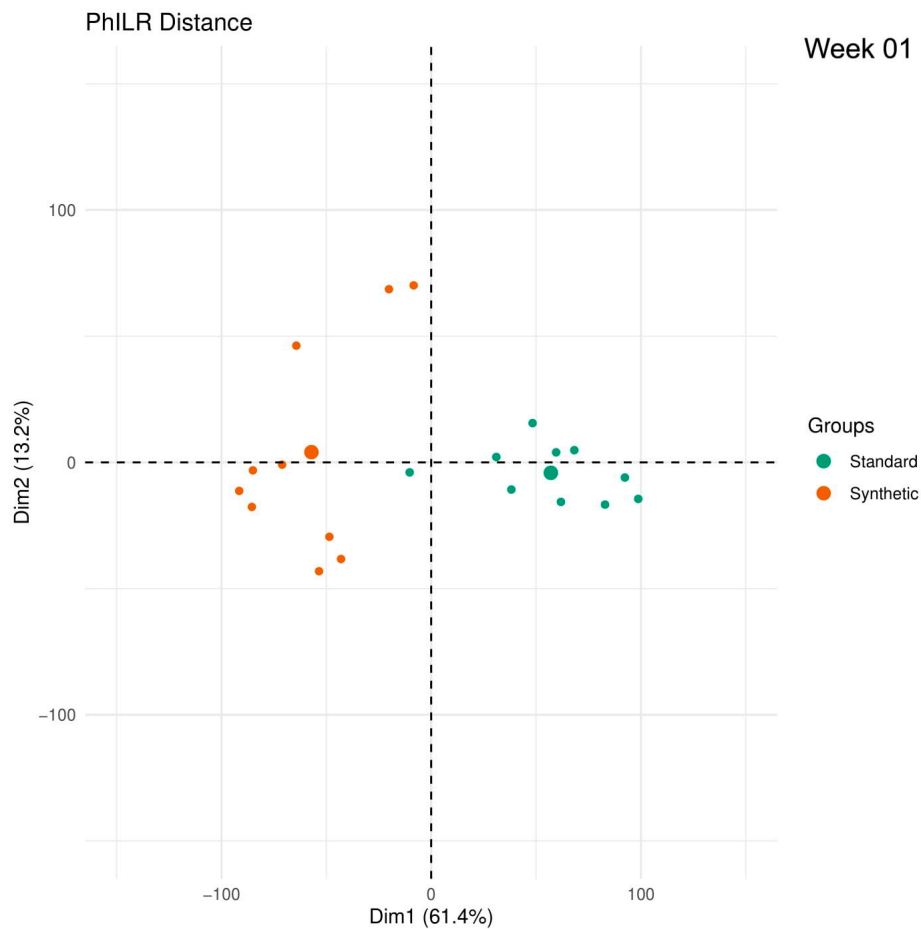

**Supplementary Figure S2.** Principal component analysis (PCA) of PhILR distances for the gut microbiota of synthetic and standard diet animals after 1 week of consuming the assigned diet. Individual samples are represented by one point; larger circles represent the mean coordinates for each diet group.

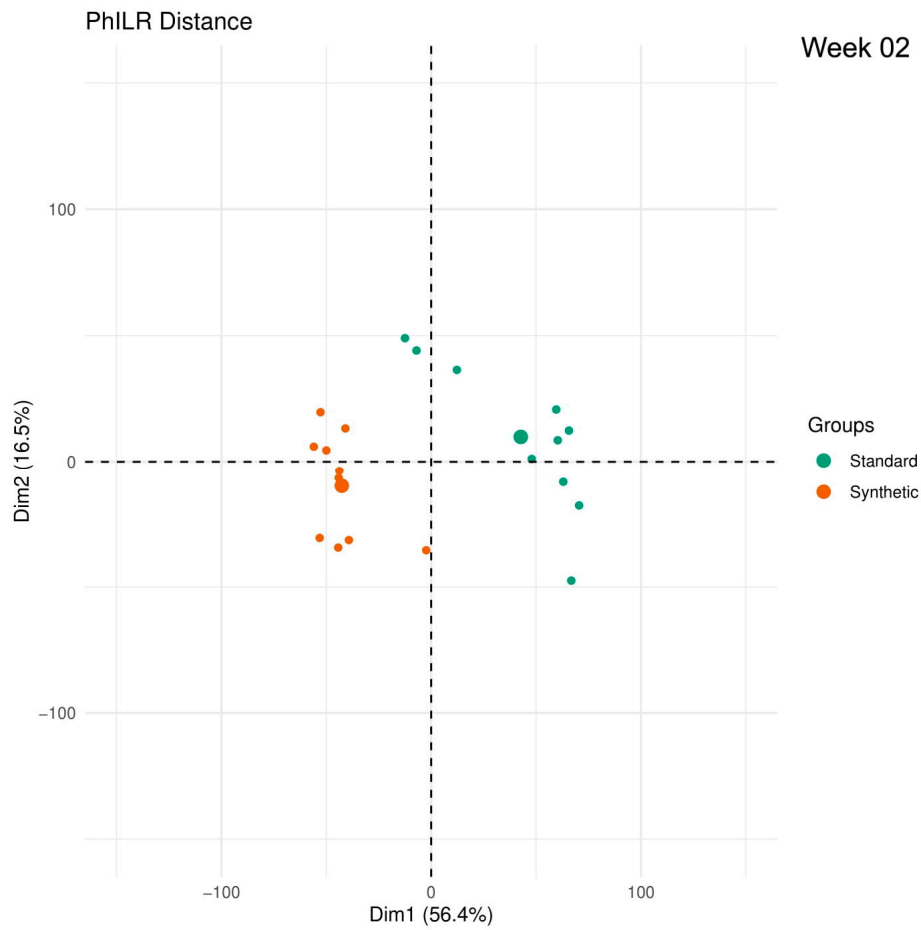

**Supplementary Figure S3.** Principal component analysis (PCA) of PhILR distances for the gut microbiota of synthetic and standard diet animals after 2 weeks of consuming the assigned diet. Individual samples are represented by one point; larger circles represent the mean coordinates for each diet group.

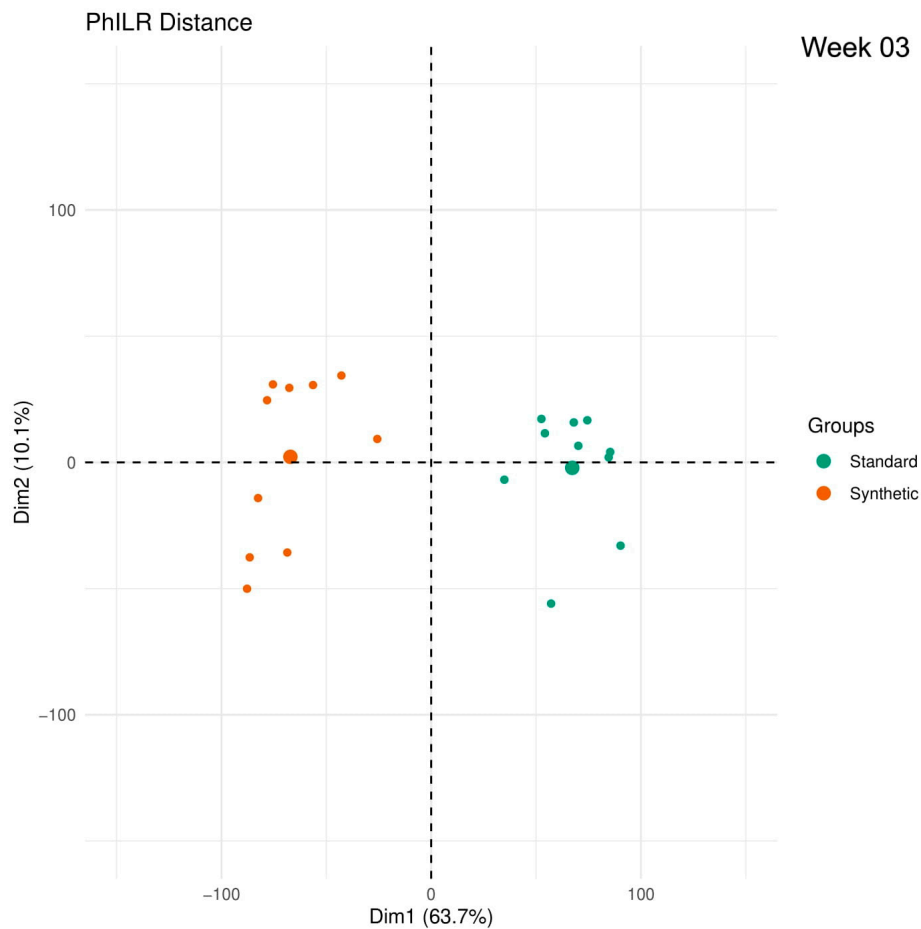

**Supplementary Figure S4.** Principal component analysis (PCA) of PhILR distances for the gut microbiota of synthetic and standard diet animals after 3 weeks of consuming the assigned diet. Individual samples are represented by one point; larger circles represent the mean coordinates for each diet group.

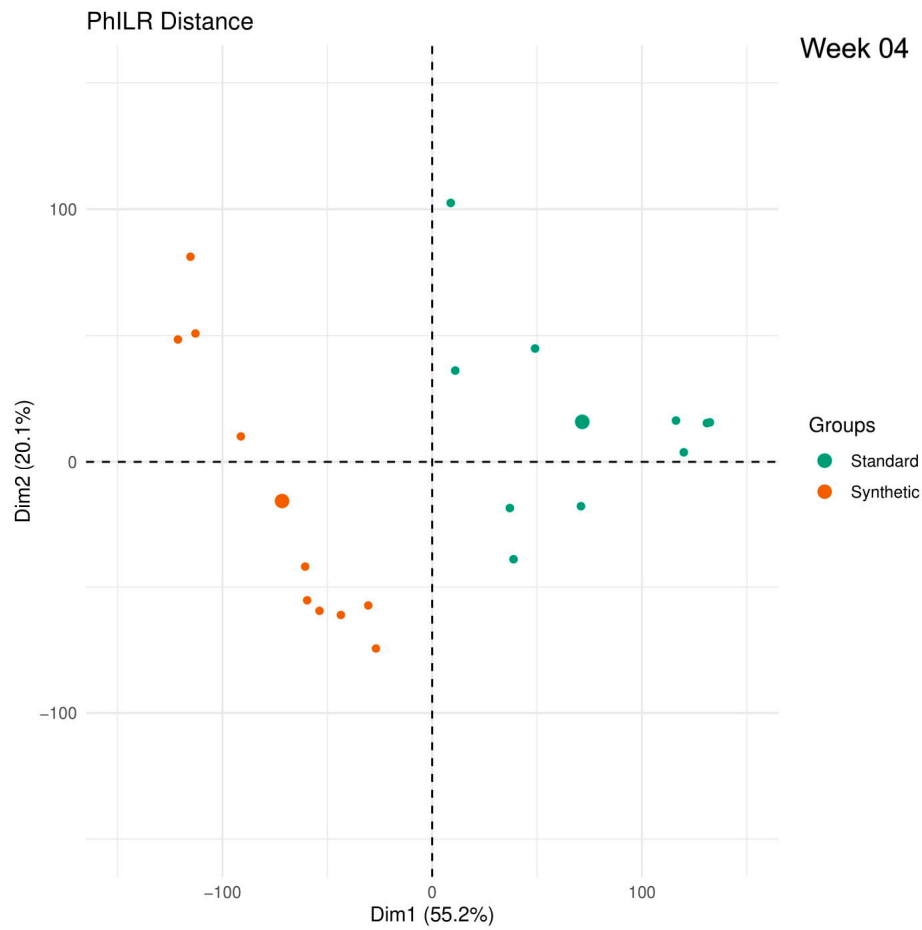

**Supplementary Figure S5.** Principal component analysis (PCA) of PhILR distances for the gut microbiota of synthetic and standard diet animals after 4 weeks of consuming the assigned diet. Individual samples are represented by one point; larger circles represent the mean coordinates for each diet group.

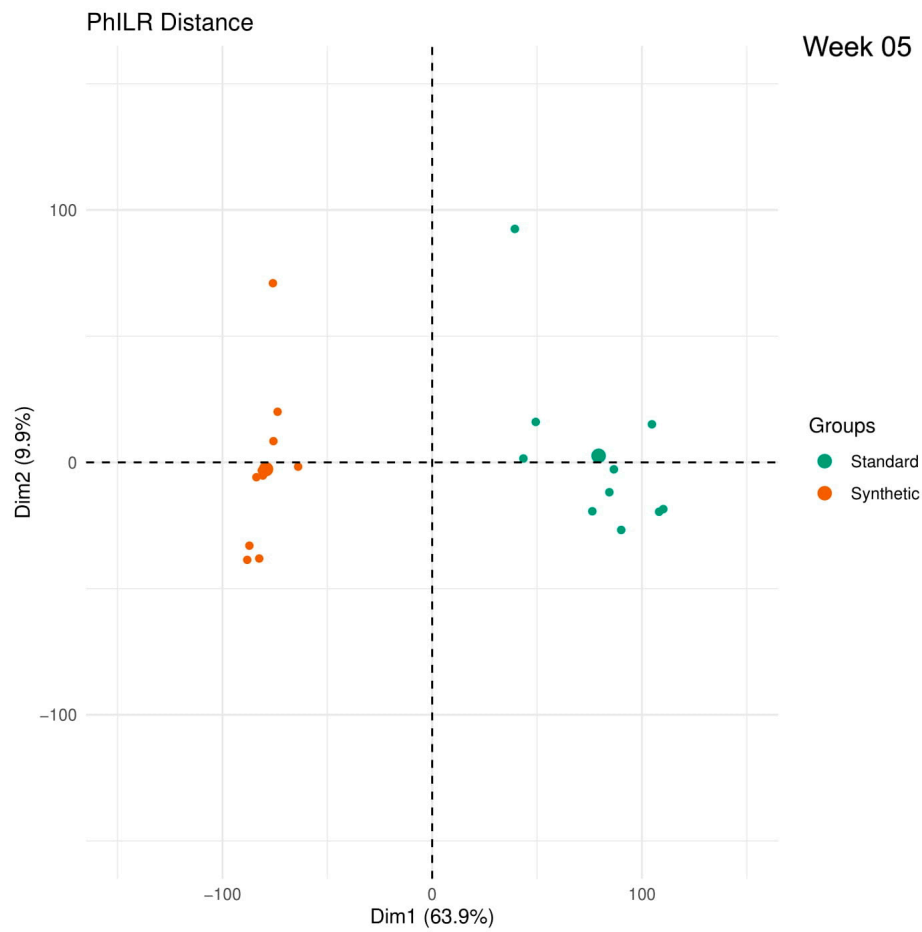

**Supplementary Figure S6.** Principal component analysis (PCA) of PhILR distances for the gut microbiota of synthetic and standard diet animals after 5 weeks of consuming the assigned diet. Individual samples are represented by one point; larger circles represent the mean coordinates for each diet group.

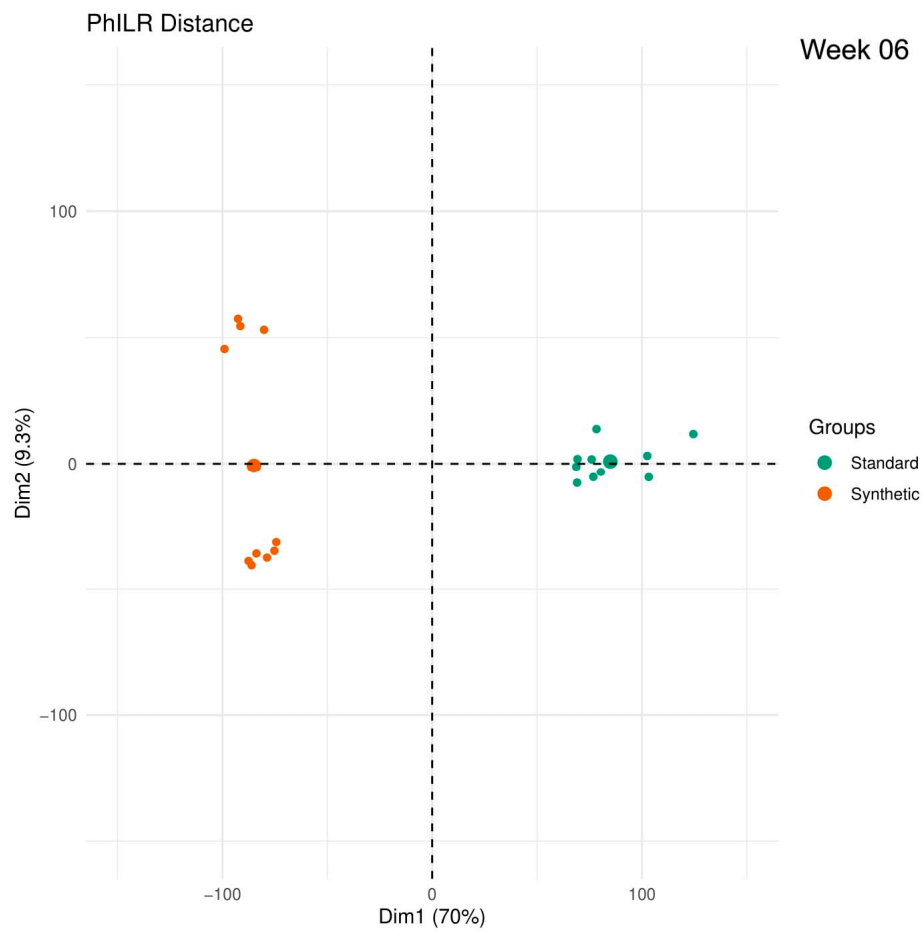

**Supplementary Figure S7.** Principal component analysis (PCA) of PhILR distances for the gut microbiota of synthetic and standard diet animals after 6 weeks of consuming the assigned diet. Individual samples are represented by one point; larger circles represent the mean coordinates for each diet group.

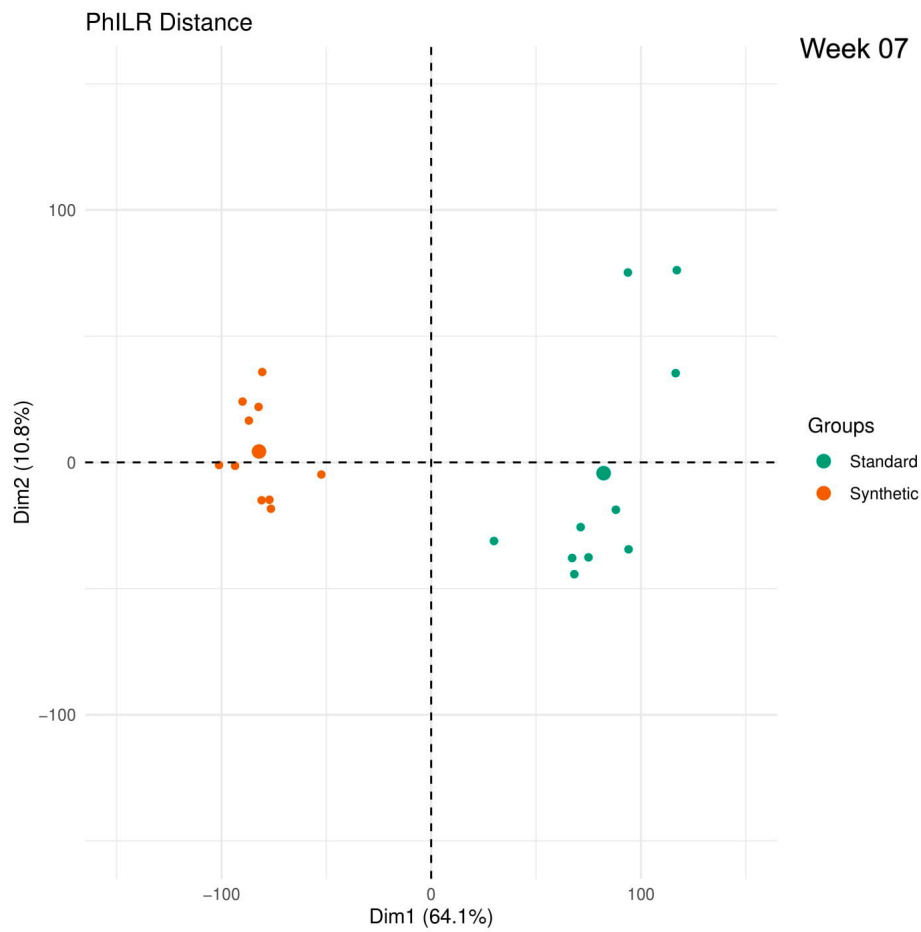

**Supplementary Figure S8.** Principal component analysis (PCA) of PhILR distances for the gut microbiota of synthetic and standard diet animals after 7 weeks of consuming the assigned diet. Individual samples are represented by one point; larger circles represent the mean coordinates for each diet group.



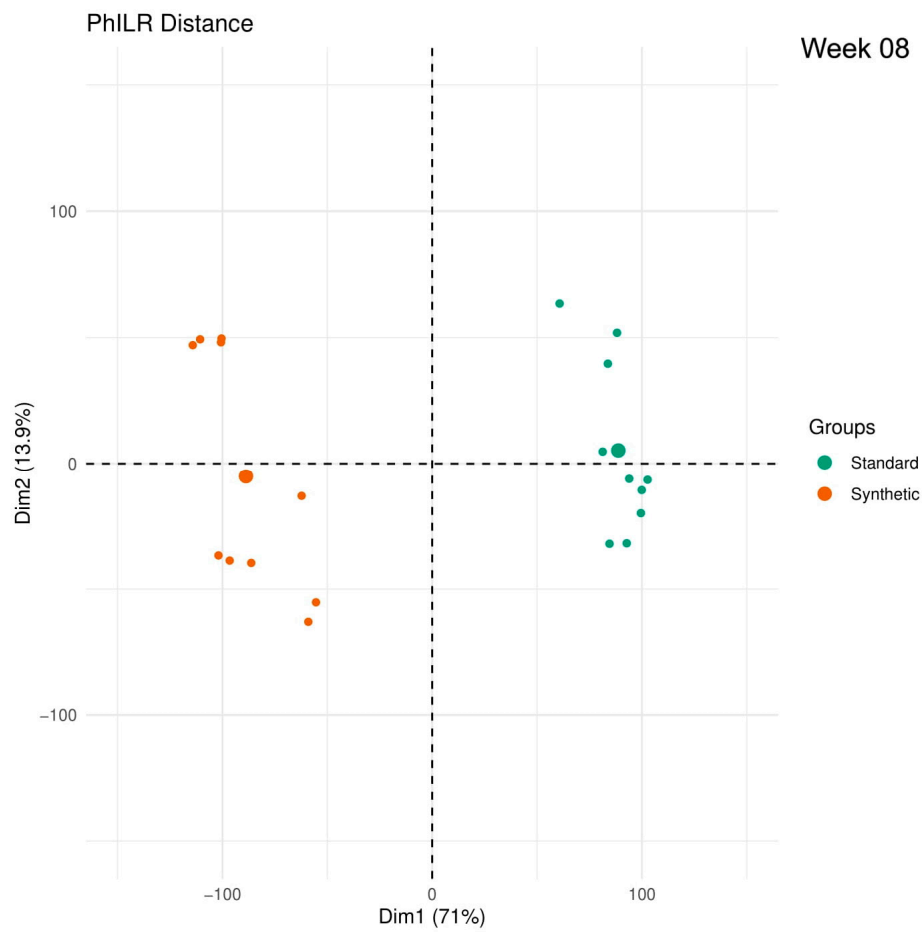

**Supplementary Figure S9.** Principal component analysis (PCA) of PhILR distances for the gut microbiota of synthetic and standard diet animals after 8 weeks of consuming the assigned diet. Individual samples are represented by one point; larger circles represent the mean coordinates for each diet group.

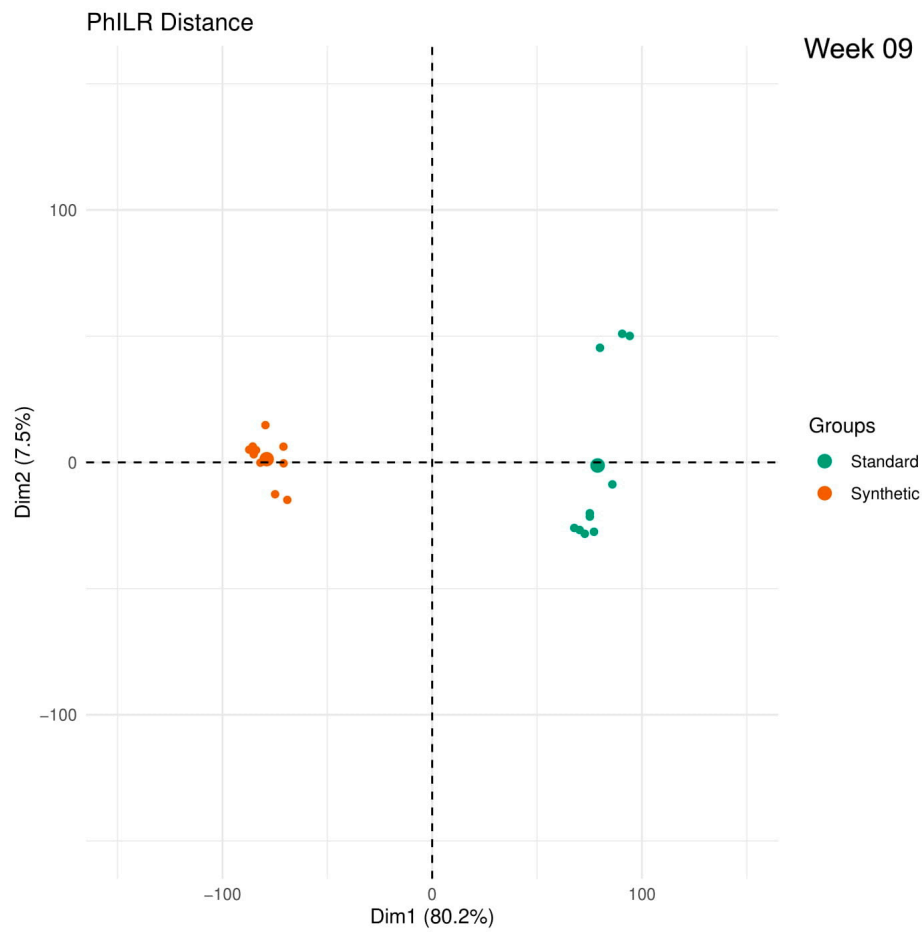

**Supplementary Figure S10.** Principal component analysis (PCA) of PhILR distances for the gut microbiota of synthetic and standard diet animals after 9 weeks of consuming the assigned diet. Individual samples are represented by one point; larger circles represent the mean coordinates for each diet group.

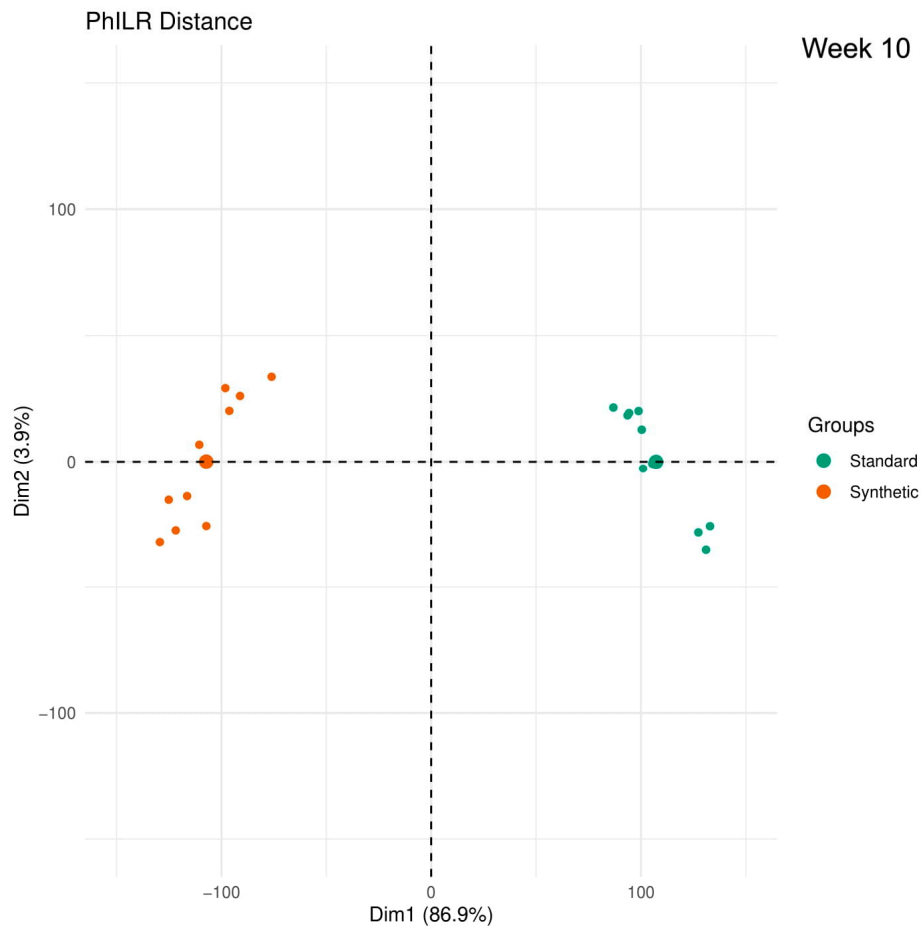

**Supplementary Figure S11.** Principal component analysis (PCA) of PhILR distances for the gut microbiota of synthetic and standard diet animals after 10 weeks of consuming the assigned diet. Individual samples are represented by one point; larger circles represent the mean coordinates for each diet group.

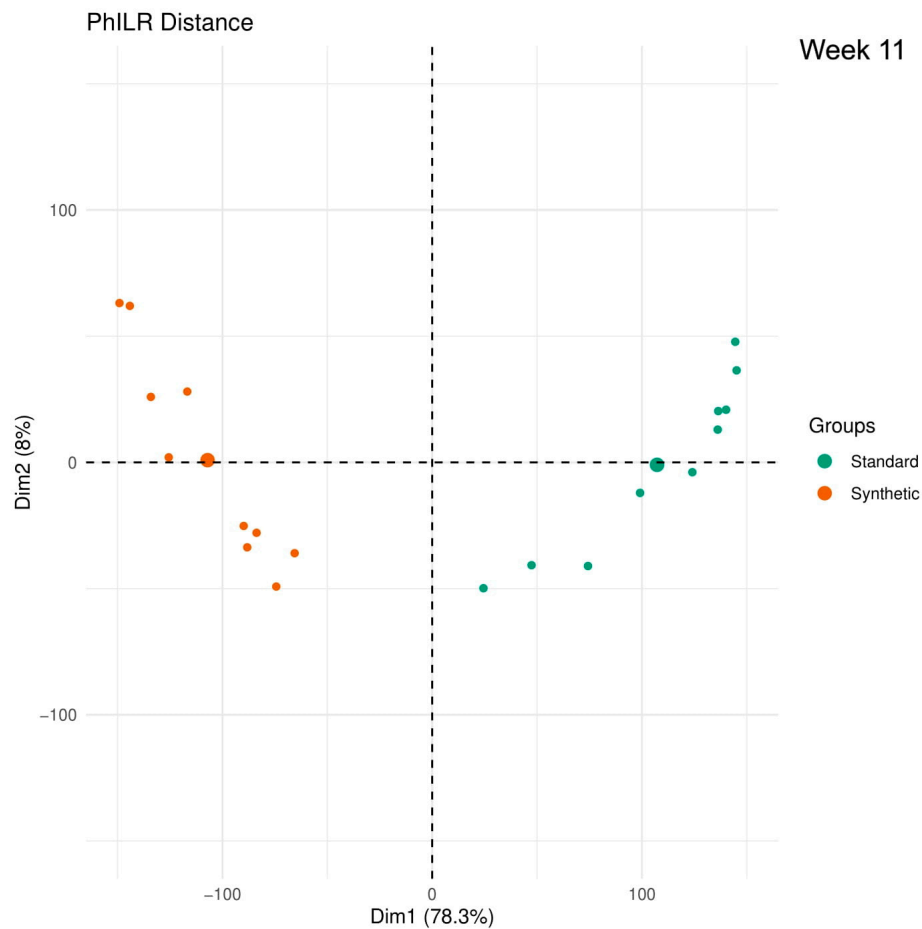

**Supplementary Figure S12.** Principal component analysis (PCA) of PhILR distances for the gut microbiota of synthetic and standard diet animals after 11 weeks of consuming the assigned diet. Individual samples are represented by one point; larger circles represent the mean coordinates for each diet group.

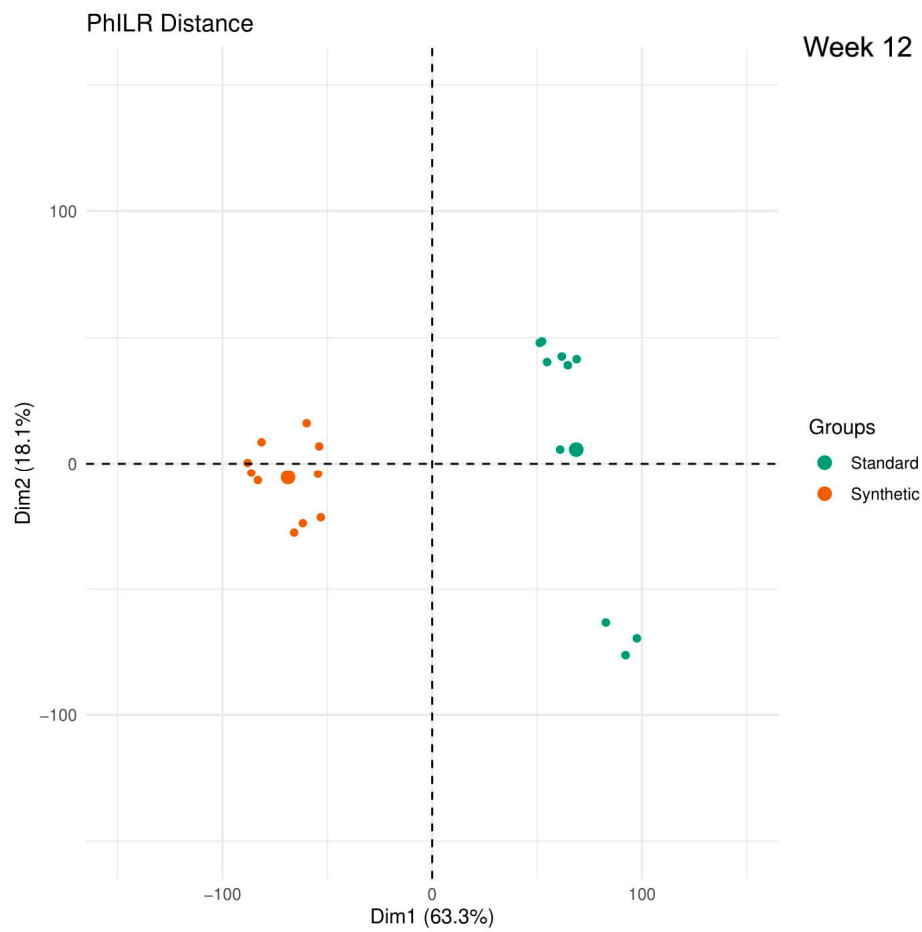

**Supplementary Figure S13.** Principal component analysis (PCA) of PhILR distances for the gut microbiota of synthetic and standard diet animals after 12 weeks of consuming the assigned diet. Individual samples are represented by one point; larger circles represent the mean coordinates for each diet group.

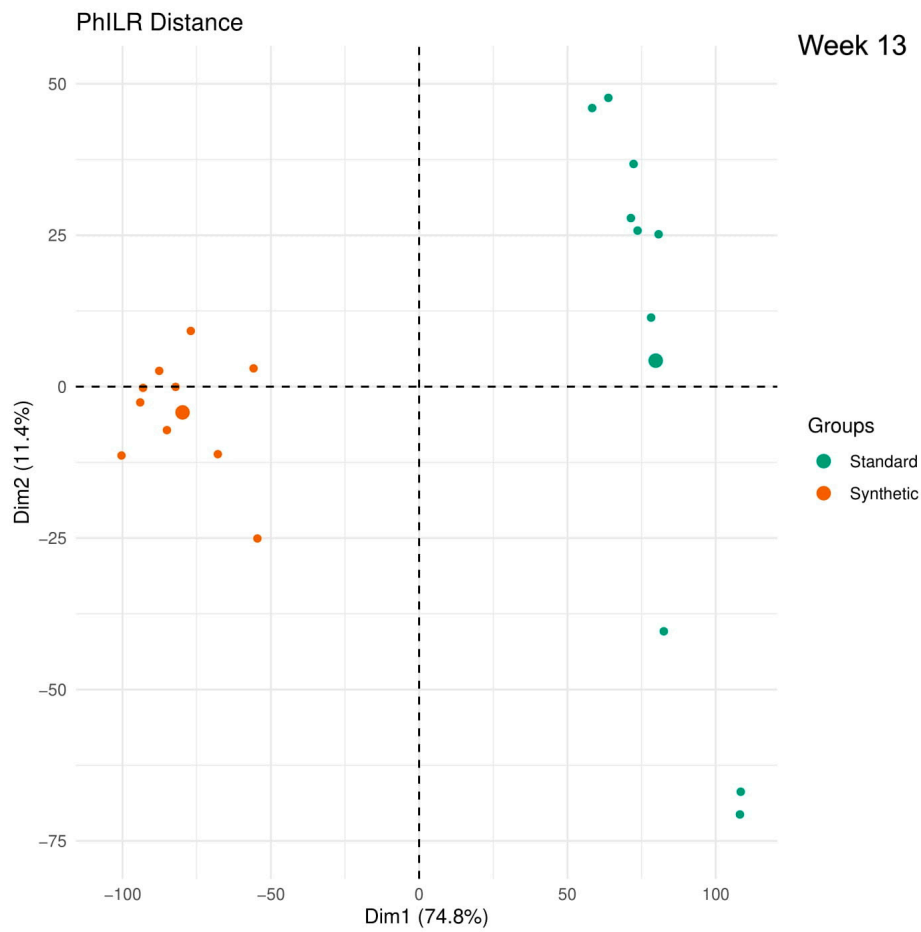

**Supplementary Figure S14.** Principal component analysis (PCA) of PhILR distances for the gut microbiota of synthetic and standard diet animals after 13 weeks of consuming the assigned diet. Individual samples are represented by one point; larger circles represent the mean coordinates for each diet group.

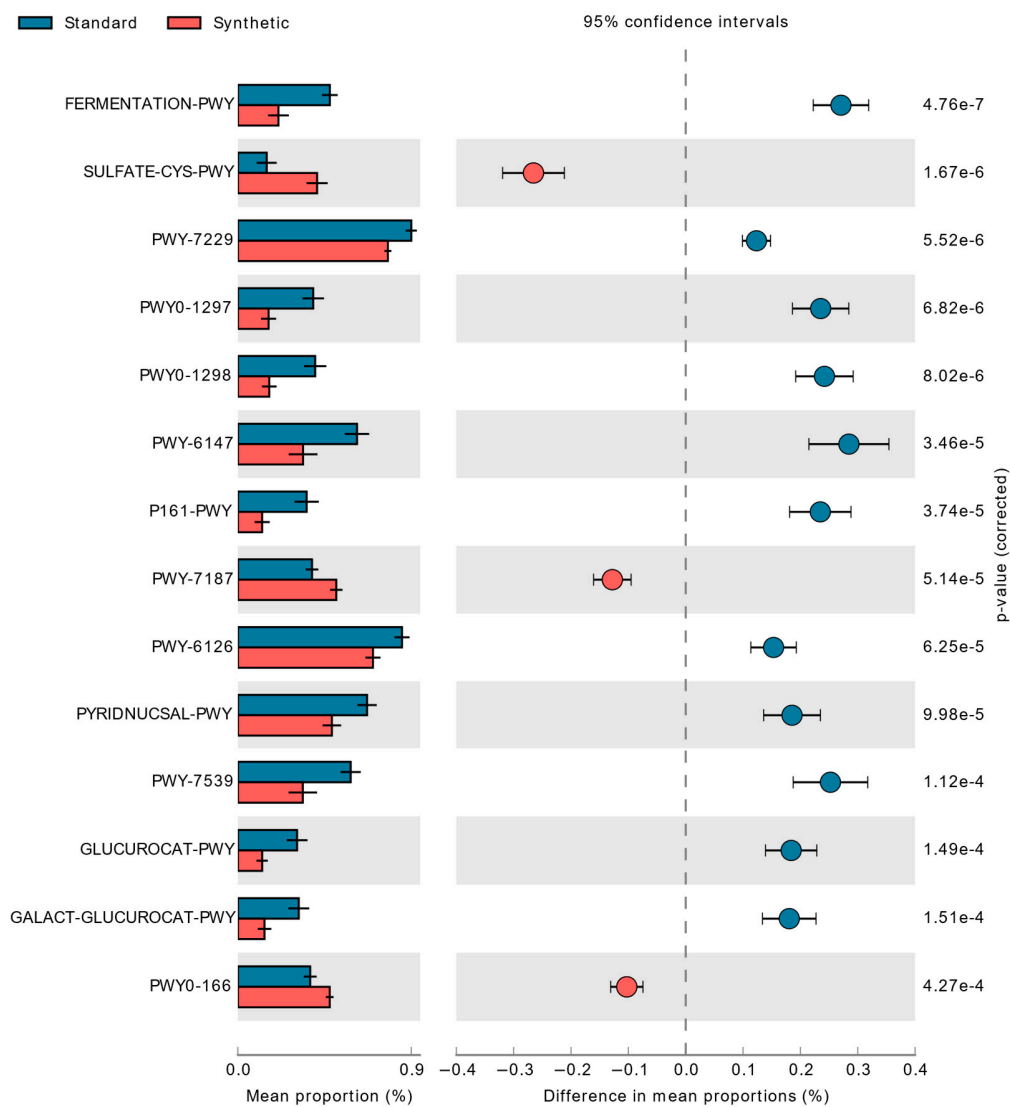

**Supplementary Figure S15.** PICRUST2 analysis predicted 14 metabolic pathways may be affected by the consumption of the synthetic formula diet (coral) compared to the standard diet (blue), based on microbiota present in the gut microbiome in mice in each dietary group at week 13. The colored bars represent 95% confidence intervals calculated using Welch's inverted method ( $p \leq 0.05$  with Bonferroni corrections for multiple comparisons). The colored circles represent the difference in mean proportions between synthetic diet and standard diet animal samples.

## 1.2 Supplementary Tables

|                    | <b>Standard</b><br>% by weight | <b>Synthetic</b><br>% by weight |
|--------------------|--------------------------------|---------------------------------|
| <b>Protein</b>     | 18.2                           | 18.2                            |
| <b>CHO</b>         | 55.8                           | 60.3                            |
| <b>Fat</b>         | 5.2                            | 5.2                             |
| <b>Crude Fiber</b> | 4.9                            | 5%                              |
| <b>kcal/g</b>      | 3.43                           | 3.6                             |

**Supplemental Table S1.** Nutrient Information



| <b>Standard Diet Ingredients:</b>                     |
|-------------------------------------------------------|
| Ground Corn                                           |
| Wheat Middlings                                       |
| Dehulled Soybean Meal                                 |
| Ground Wheat                                          |
| Fish Meal                                             |
| Porcine Animal Fat Preserved with BHA and Citric Acid |
| Dehydrated Alfalfa Meal                               |
| Cane Molasses                                         |
| Ground Oats                                           |
| Wheat Germ                                            |
| Calcium Carbonate                                     |
| Brewers dried Yeast                                   |
| Salt                                                  |
| Dried Beet Pulp                                       |
| Corn Gluten Meal                                      |
| Ground Soy-Bean Hulls                                 |
| Soybean Oil                                           |
| Dried Whey                                            |
| Porcine Meat and Bone Meal                            |

|                                         |
|-----------------------------------------|
| Dicalcium Phosphate                     |
| L-Lysine                                |
| Sucrose                                 |
| DL-Methionine                           |
| Menadione Dimethylpyrimidinol Bisulfite |
| Magnesium Oxide                         |
| Vitamin A Acetate                       |
| Cholecalciferol                         |
| Biotin                                  |
| DL-Alpha Tocopheryl Acetate             |
| Riboflavin Supplement                   |
| Folic Acid                              |
| Vitamin B-12 Supplement                 |
| Nicotinic Acid                          |
| Calcium Pantothenate                    |
| Pyridoxine Hydrochloride                |
| Manganous Oxide                         |
| Zinc Oxide                              |
| Ferrous Carbonate                       |
| Copper Sulfate                          |

|                  |
|------------------|
| Zinc Sulfate     |
| Calcium Iodate   |
| Cobalt Carbonate |
| Sodium Selenite  |

**Supplemental Table S2.** List of Ingredients in Standard Diet

| <b>Synthetic Diet Ingredients:</b> |
|------------------------------------|
| L-Alanine                          |
| L-Arginine HCl                     |
| L-Asparagine                       |
| L-Aspartic Acid                    |
| L-Cystine                          |
| L-Glutamic Acid                    |
| L-Glutamine                        |
| Glycine                            |
| L-Histidine HCl, monohydrate       |
| L-Isoleucine                       |
| L-Leucine                          |
| L-Lysine HCl                       |
| L-Methionine                       |

|                                           |
|-------------------------------------------|
| L-Phenylalanine                           |
| L-Proline                                 |
| L-Serine                                  |
| L-Threonine                               |
| L-Tryptophan                              |
| L-Tyrosine                                |
| L-Valine                                  |
| Taurine                                   |
| Sucrose                                   |
| Corn Starch                               |
| Maltodextrin                              |
| Lard                                      |
| Soybean Oil                               |
| Cellulose                                 |
| Mineral Mix, AIN-93M-MX (94049)           |
| Calcium Phosphate, monobasic, monohydrate |
| Vitamin Mix, AIN-93-VX (94047)            |
| Choline Bitartrate                        |
| TBHQ, antioxidant                         |

**Supplemental Table S3.** List of Ingredients in the Synthetic Diet

| Diet Condition        | % Insoluble Fiber | % Soluble Fiber |
|-----------------------|-------------------|-----------------|
| Synthetic Diet        | 5%                | 0%              |
| Standard Control Diet | 8.58%             | 1.2%            |

**Supplemental Table S4.** Fiber Content in Experimental Diets

| Pathway          | p-value  | In synthetic vs standard | MetaCyc Pathway                                                |
|------------------|----------|--------------------------|----------------------------------------------------------------|
| FERMENTATION-PWY | 4.76E-07 | lower                    | mixed acid fermentation                                        |
| SULFATE-CYS-PWY  | 1.67E-06 | higher                   | superpathway of sulfate assimilation and cysteine biosynthesis |
| PWY-7229         | 5.52E-06 | lower                    | superpathway of adenosine nucleotides de novo biosynthesis I   |
| PWY0-1297        | 6.82E-06 | lower                    | superpathway of purine deoxyribonucleosides degradation        |
| PWY0-1298        | 8.02E-06 | lower                    | superpathway of pyrimidine deoxyribonucleosides degradation    |
| PWY-6147         | 3.46E-05 | lower                    | 6-hydroxymethyl-dihydropterin diphosphate biosynthesis I       |
| P161-PWY         | 3.74E-05 | lower                    | acetylene degradation (anaerobic)                              |
| PWY-7187         | 5.14E-05 | higher                   | pyrimidine deoxyribonucleotides de novo biosynthesis II        |

|                         |          |        |                                                                                |
|-------------------------|----------|--------|--------------------------------------------------------------------------------|
| PWY-6126                | 6.25E-05 | lower  | superpathway of adenosine nucleotides de novo biosynthesis II                  |
| PYRIDNUCSAL-PWY         | 9.98E-05 | lower  | NAD salvage pathway I (PNC VI cycle)                                           |
| PWY-7539                | 1.12E-04 | lower  | 6-hydroxymethyl-dihydropterin diphosphate biosynthesis III (Chlamydia)         |
| GLUCUROCAT-PWY          | 1.49E-04 | lower  | superpathway of $\beta$ -D-glucuronosides degradation                          |
| GALACT-GLUCUROCAT-PWY   | 1.51E-04 | lower  | superpathway of hexuronide and hexuronate degradation                          |
| PWY0-166                | 4.27E-04 | higher | superpathway of pyrimidine deoxyribonucleotides de novo biosynthesis (E. coli) |
| GLYOXYLATE-BYPASS       | 1.32E-03 | higher | glyoxylate cycle                                                               |
| PWY-5659                | 1.41E-03 | higher | GDP-mannose biosynthesis                                                       |
| PWY-6385                | 1.56E-03 | lower  | peptidoglycan biosynthesis III (mycobacteria)                                  |
| SO4ASSIM-PWY            | 2.00E-03 | higher | assimilatory sulfate reduction I                                               |
| PWY-7199                | 2.12E-03 | lower  | pyrimidine deoxyribonucleosides salvage                                        |
| PWY-7197                | 4.07E-03 | higher | pyrimidine deoxyribonucleotide phosphorylation                                 |
| PWY-7222                | 5.33E-03 | lower  | guanosine deoxyribonucleotides de novo biosynthesis II                         |
| PWY-7220                | 5.33E-03 | lower  | adenosine deoxyribonucleotides de novo biosynthesis II                         |
| BIOTIN-BIOSYNTHESIS-PWY | 7.11E-03 | higher | biotin biosynthesis I                                                          |

|                   |          |        |                                                              |
|-------------------|----------|--------|--------------------------------------------------------------|
| PWY-5971          | 9.65E-03 | higher | palmitate biosynthesis (type II fatty acid synthase)         |
| PWY-5667          | 0.01     | lower  | CDP-diacylglycerol biosynthesis I                            |
| PWY0-1319         | 0.01     | lower  | CDP-diacylglycerol biosynthesis II                           |
| PWY0-1586         | 0.01     | lower  | peptidoglycan maturation (meso-diaminopimelate containing)   |
| PWY-7392          | 0.011    | higher | taxadiene biosynthesis (engineered)                          |
| PWY-7664          | 0.012    | higher | oleate biosynthesis IV (anaerobic)                           |
| PWYG-321          | 0.012    | higher | mycolate biosynthesis                                        |
| PWY-6891          | 0.013    | higher | thiazole component of thiamine diphosphate biosynthesis II   |
| PWY0-862          | 0.014    | higher | (5Z)-dodecenoate biosynthesis I                              |
| PWY-6282          | 0.015    | higher | palmitoleate biosynthesis I (from (5Z)-dodec-5-enoate)       |
| PWY-6519          | 0.015    | higher | 8-amino-7-oxononanoate biosynthesis I                        |
| PWY-5484          | 0.016    | higher | glycolysis II (from fructose 6-phosphate)                    |
| PWY-5989          | 0.017    | higher | stearate biosynthesis II (bacteria and plants)               |
| FASYN-INITIAL-PWY | 0.018    | higher | superpathway of fatty acid biosynthesis initiation (E. coli) |
| GALACTUROCAT-PWY  | 0.021    | lower  | D-galacturonate degradation I                                |
| P441-PWY          | 0.022    | lower  | superpathway of N-acetylneuraminate degradation              |
| PWY-2942          | 0.025    | lower  | L-lysine biosynthesis III                                    |

|                   |       |        |                                                        |
|-------------------|-------|--------|--------------------------------------------------------|
| PWY-7456          | 0.034 | higher | $\beta$ -(1,4)-mannan degradation                      |
| POLYAMINSYN3-PWY  | 0.034 | lower  | superpathway of polyamine biosynthesis II              |
| HEMESYN2-PWY      | 0.035 | lower  | heme b biosynthesis II (oxygen-independent)            |
| PWY-6353          | 0.042 | lower  | purine nucleotides degradation II (aerobic)            |
| PWY-7184          | 0.046 | higher | pyrimidine deoxyribonucleotides de novo biosynthesis I |
| ARG+POLYAMINE-SYN | 0.048 | lower  | superpathway of arginine and polyamine biosynthesis    |

**Supplemental Table S5.** PICRUSt2 Results Comparing Data Collected from Mice Fed a Synthetic Diet or the Standard Diet after 13 Weeks post-weaning,  $p \leq 0.05$ .
