# Supplementary material for: A Synthetic Formula Amino Acid Diet Leads to Microbiome Dysbiosis, Reduced Colon Length, Inflammation, and Altered Locomotor Activity in C57BL/6J Mice
Source: MDPI journal article supplement (doi:10.3390/microorganisms11112694), 2023-11-03
Supplement: s1 [file s1]

Dim2 (8%)

Dim1 (78.3%)

Groups

- Standard
- Synthetic

100

0

-100

-100

0

100
