# Supplementary figures and images for: A Synthetic Formula Amino Acid Diet Leads to Microbiome Dysbiosis, Reduced Colon Length, Inflammation, and Altered Locomotor Activity in C57BL/6J Mice
Source: MDPI journal article supplement (doi:10.3390/microorganisms11112694), 2023-11-03

PhILR Distance

Week 0

Dim2 (26.6%)

Dim1 (47.2%)

Groups

- Standard
- Synthetic

100

0

-100

-100

0

100

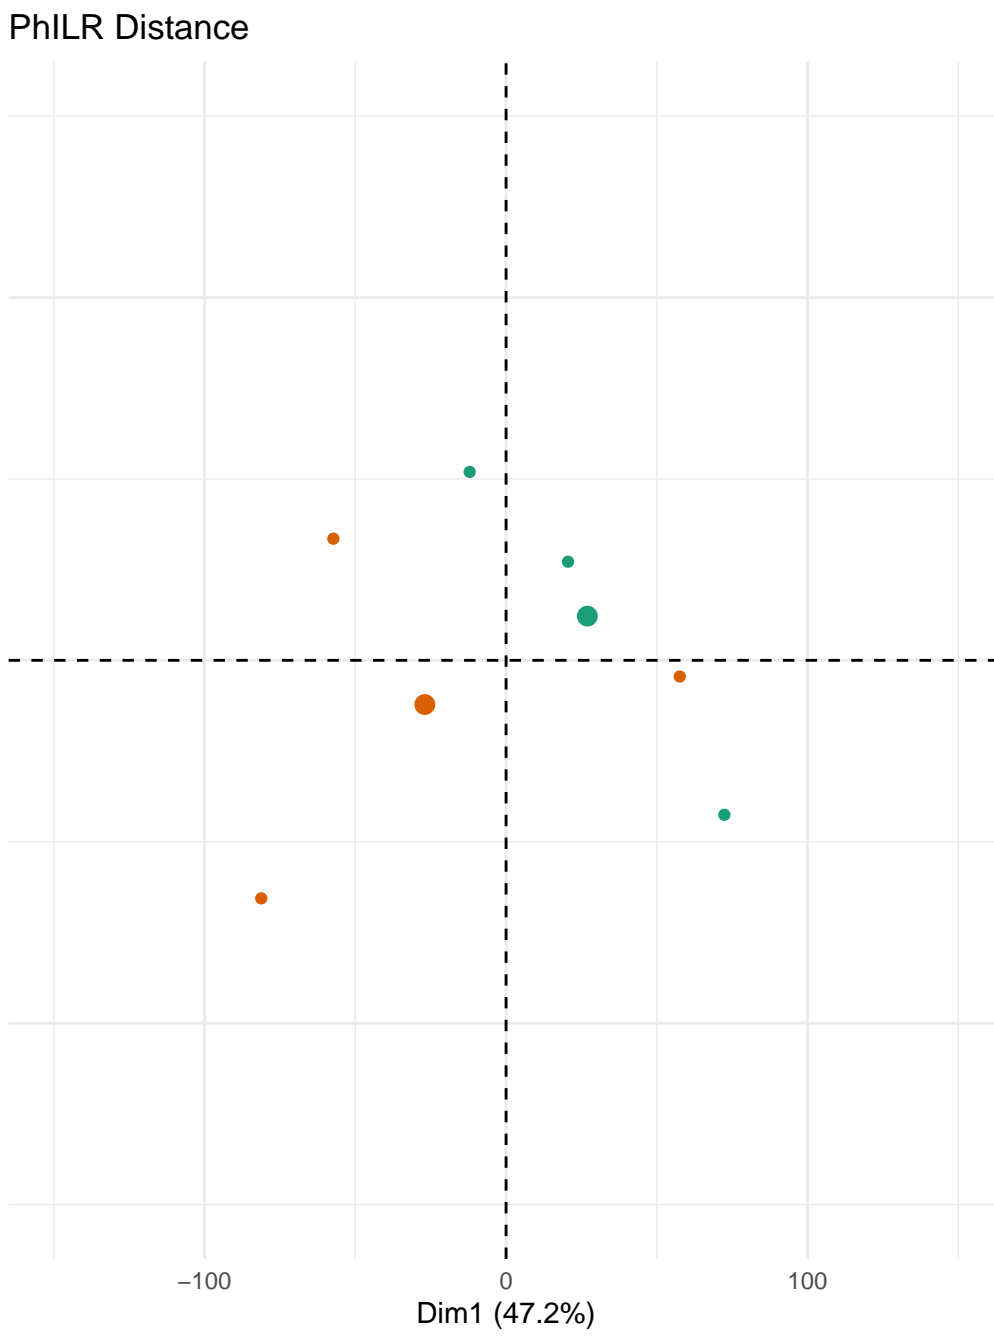

Supplement: s1 [file s1]

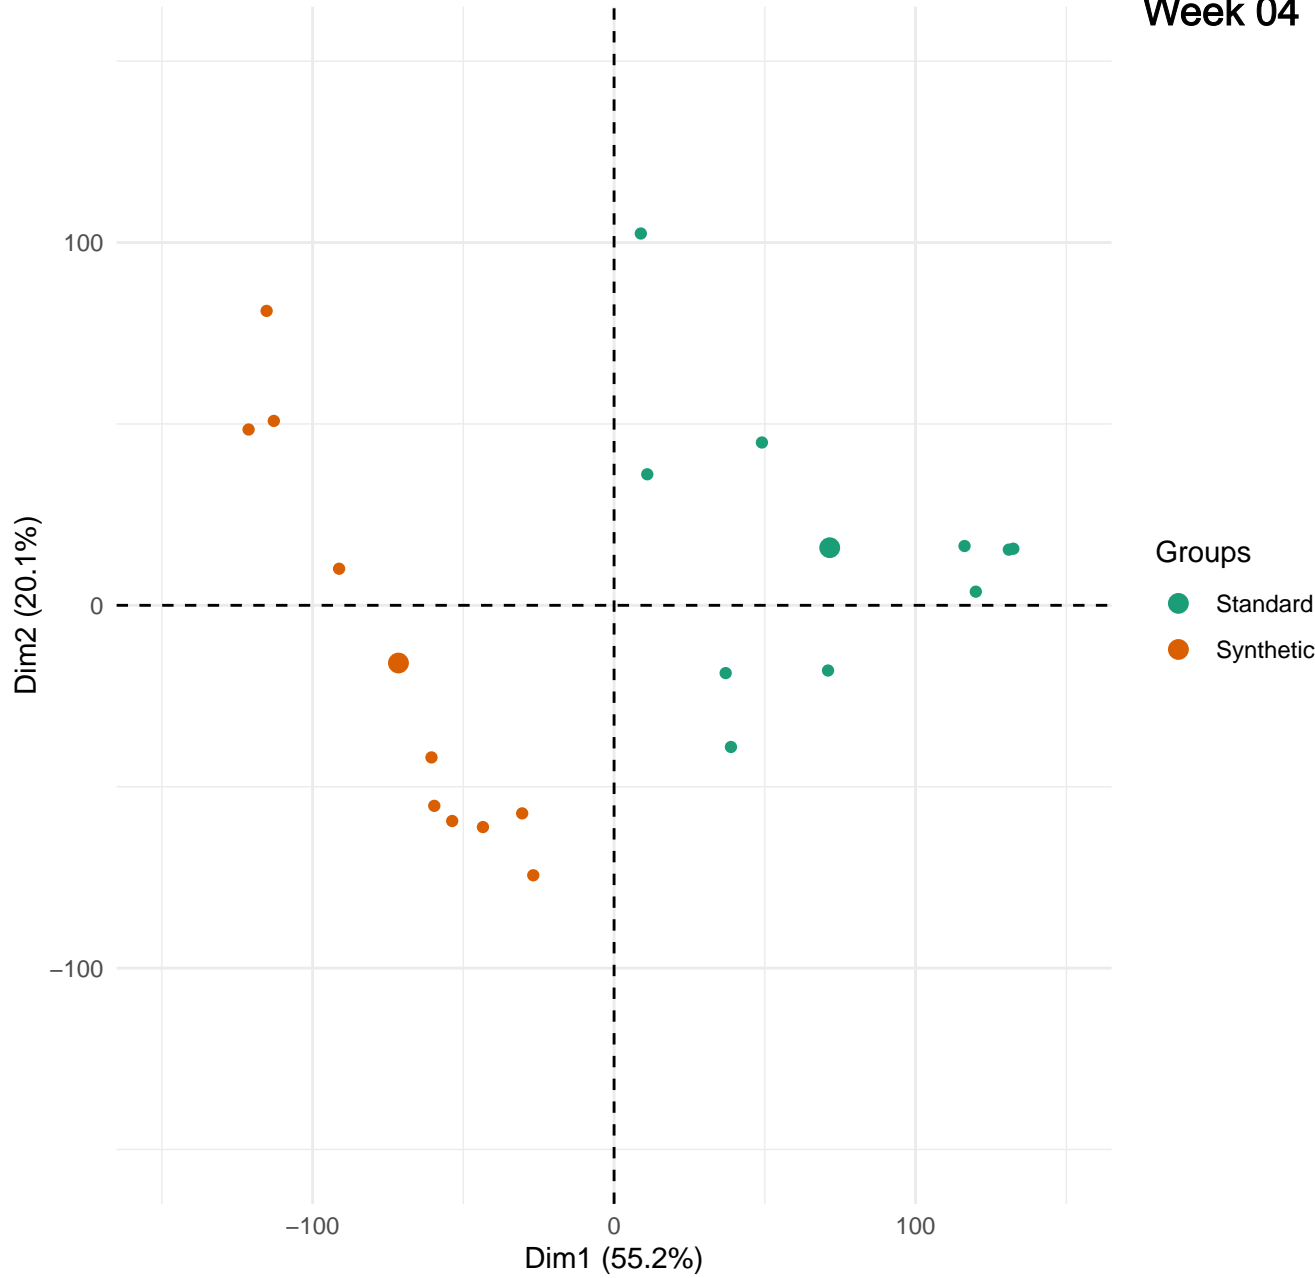

Supplement: s1 [file s1]

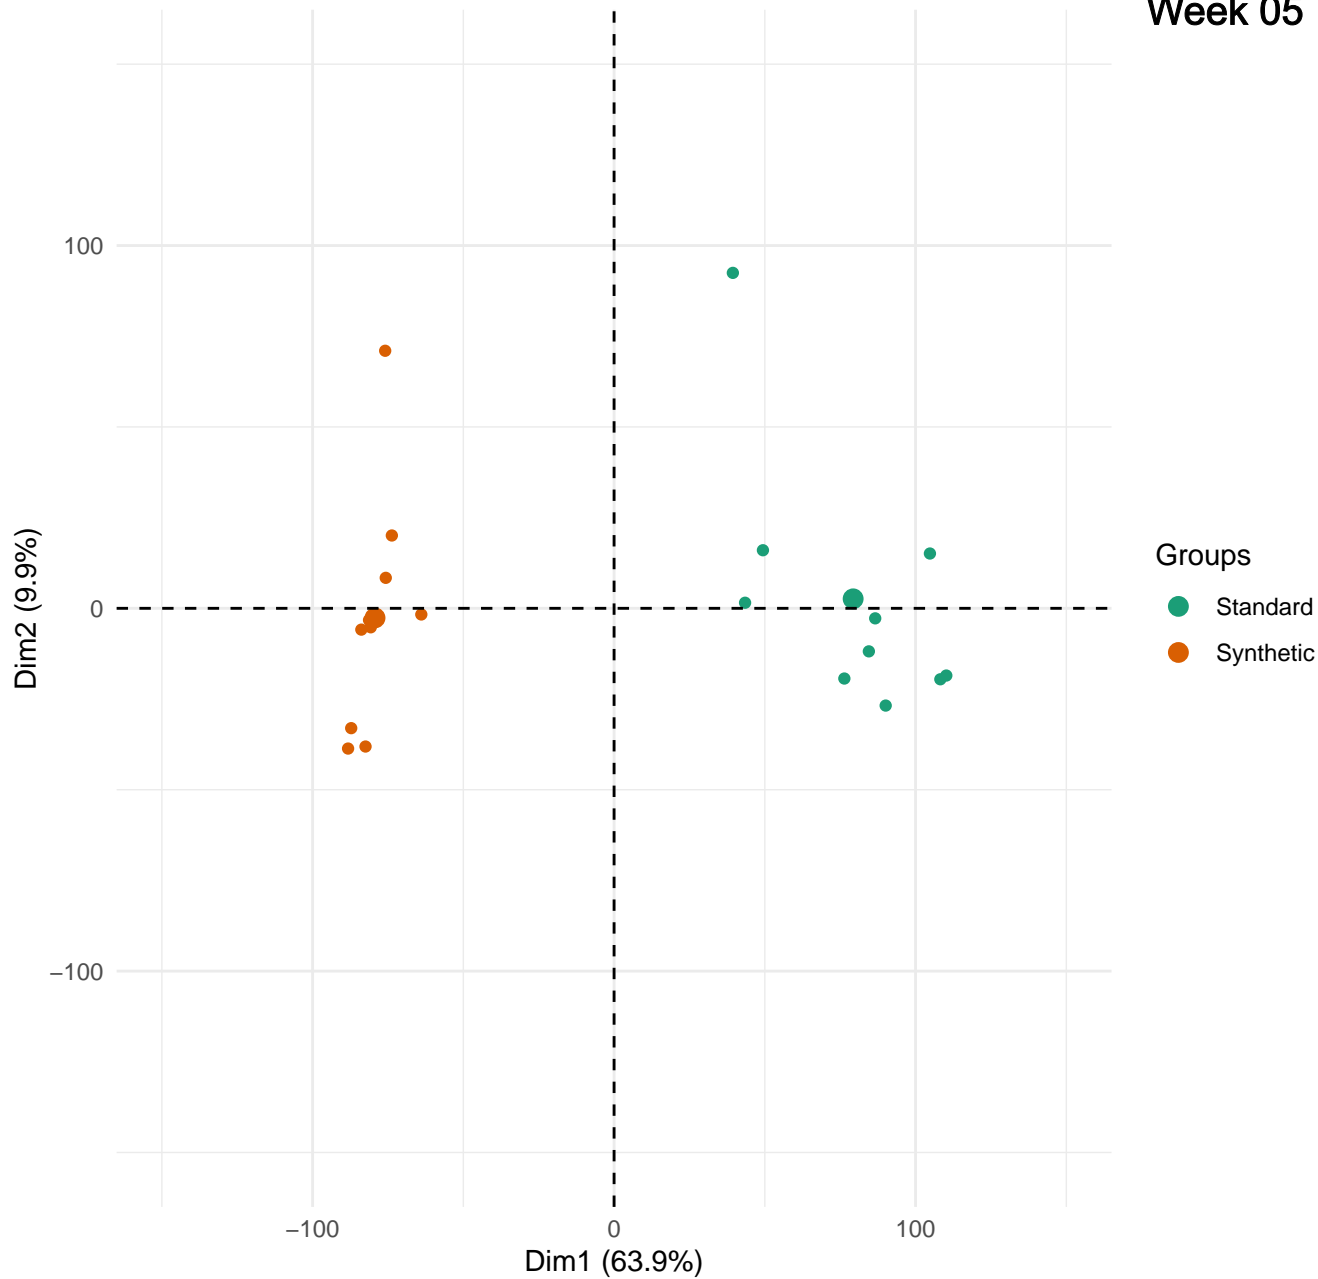

Supplement: s1 [file s1]

## Week 03

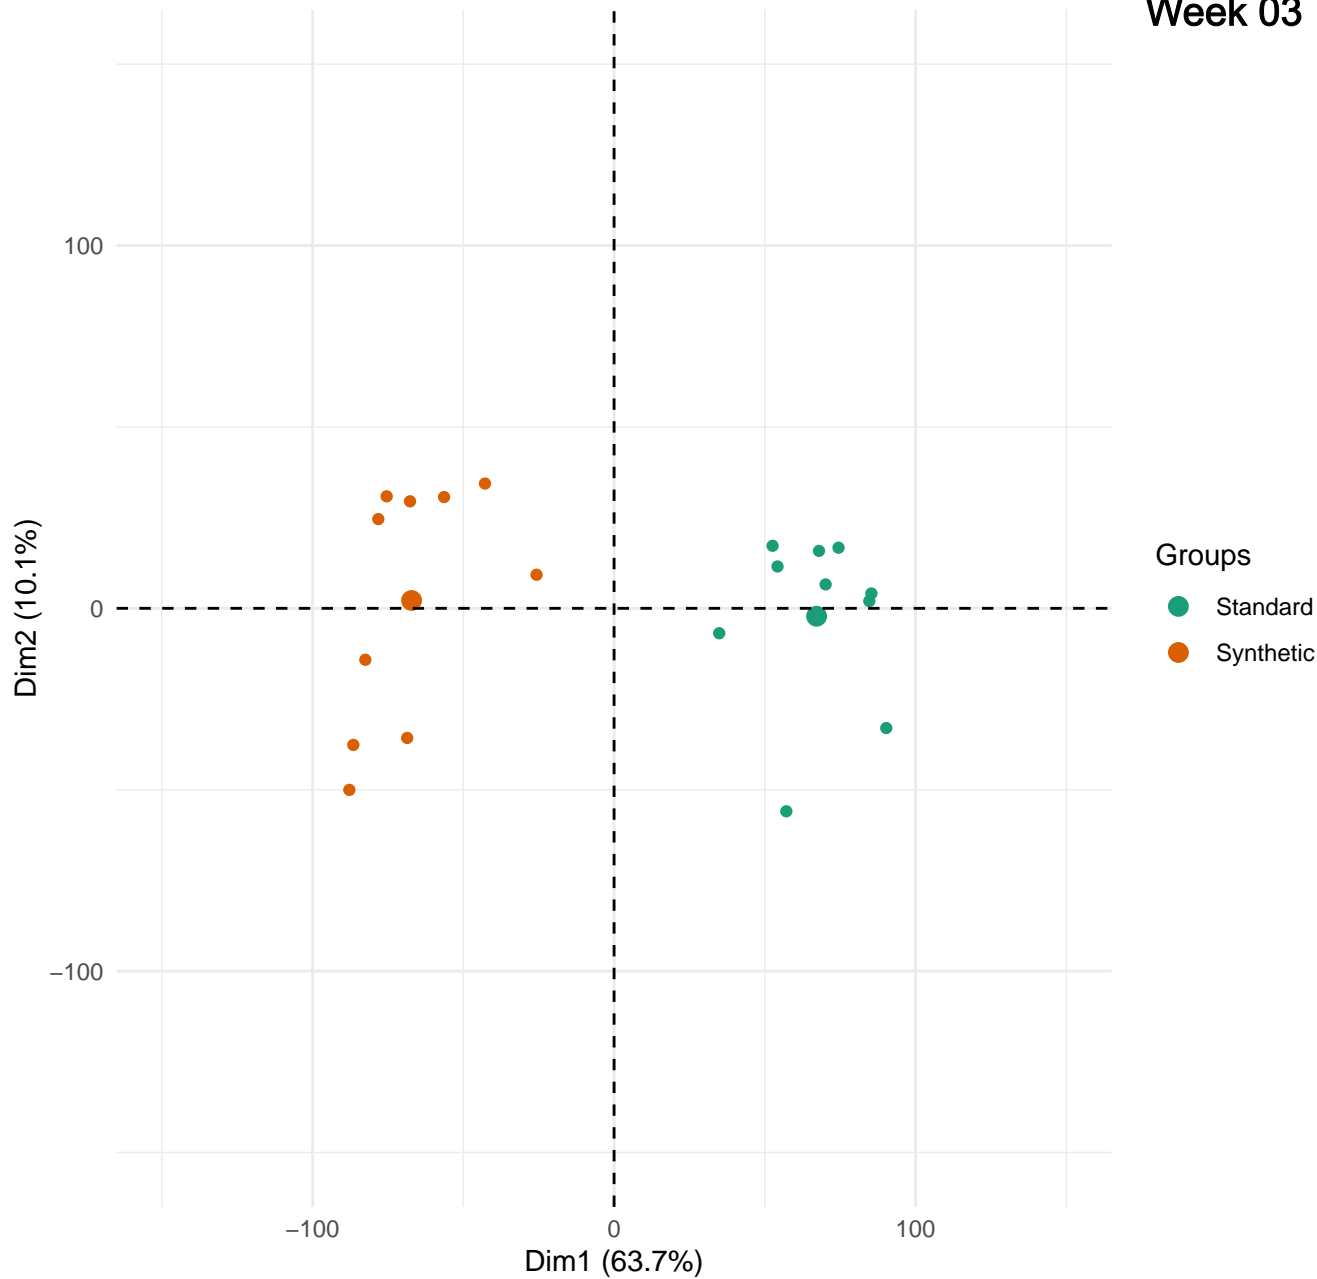

Supplement: s1 [file s1]

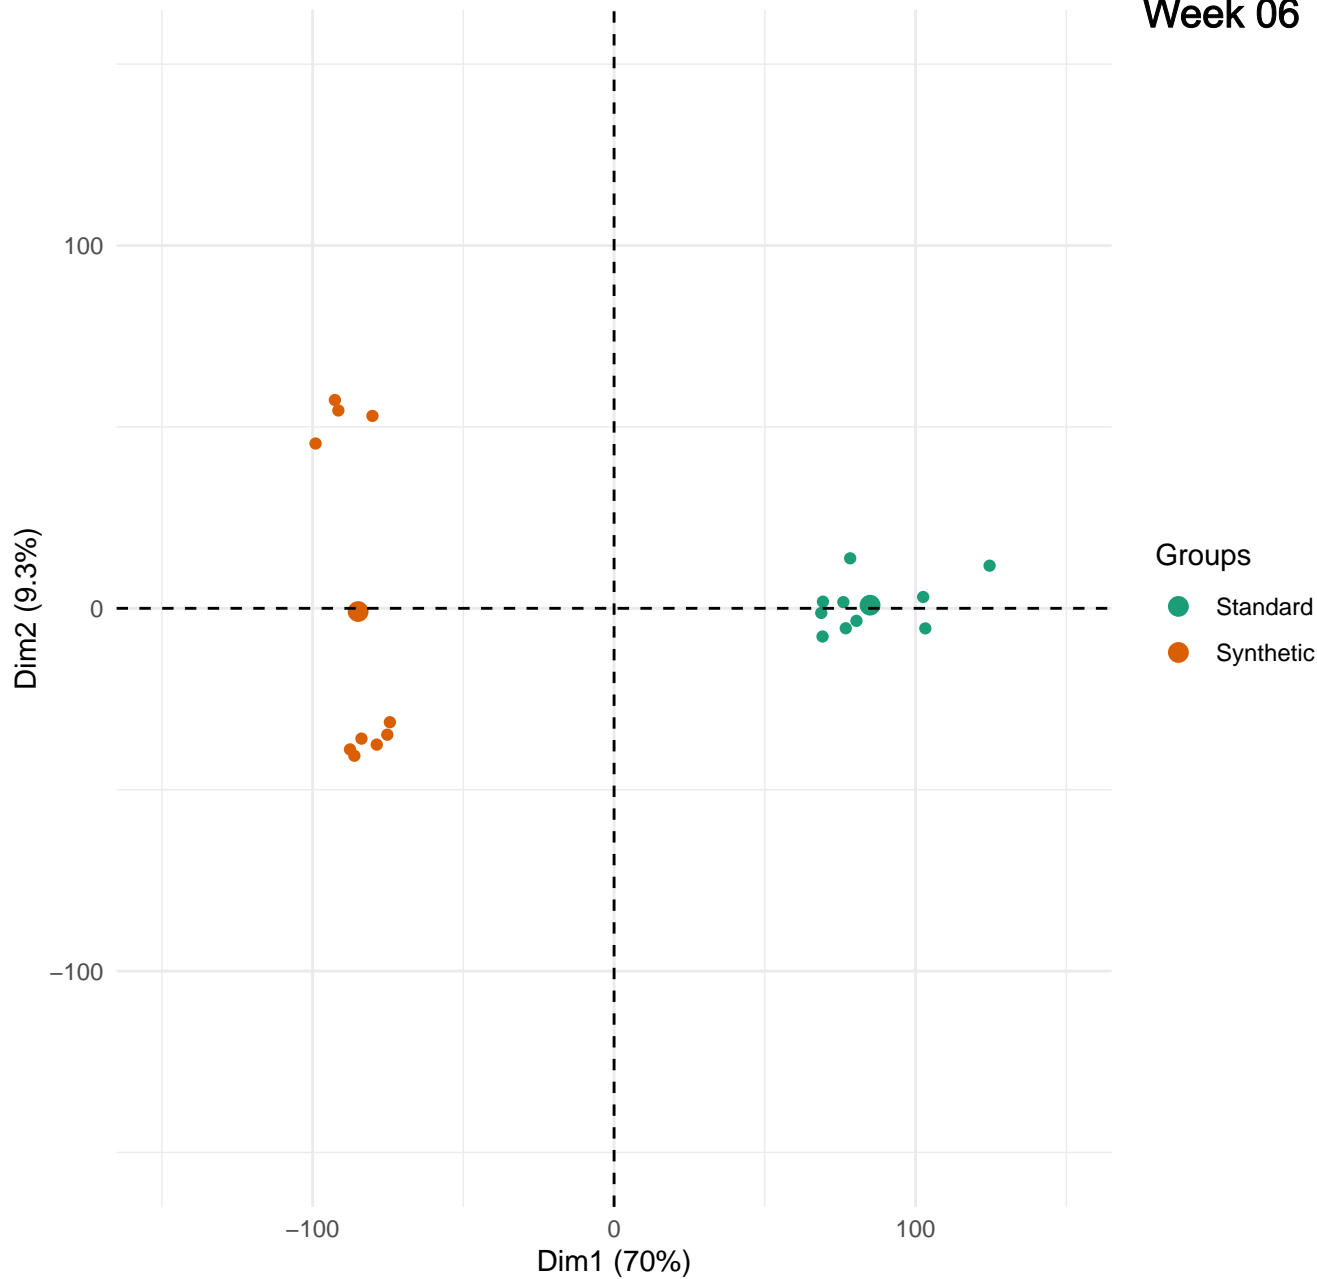

Supplement: s1 [file s1]

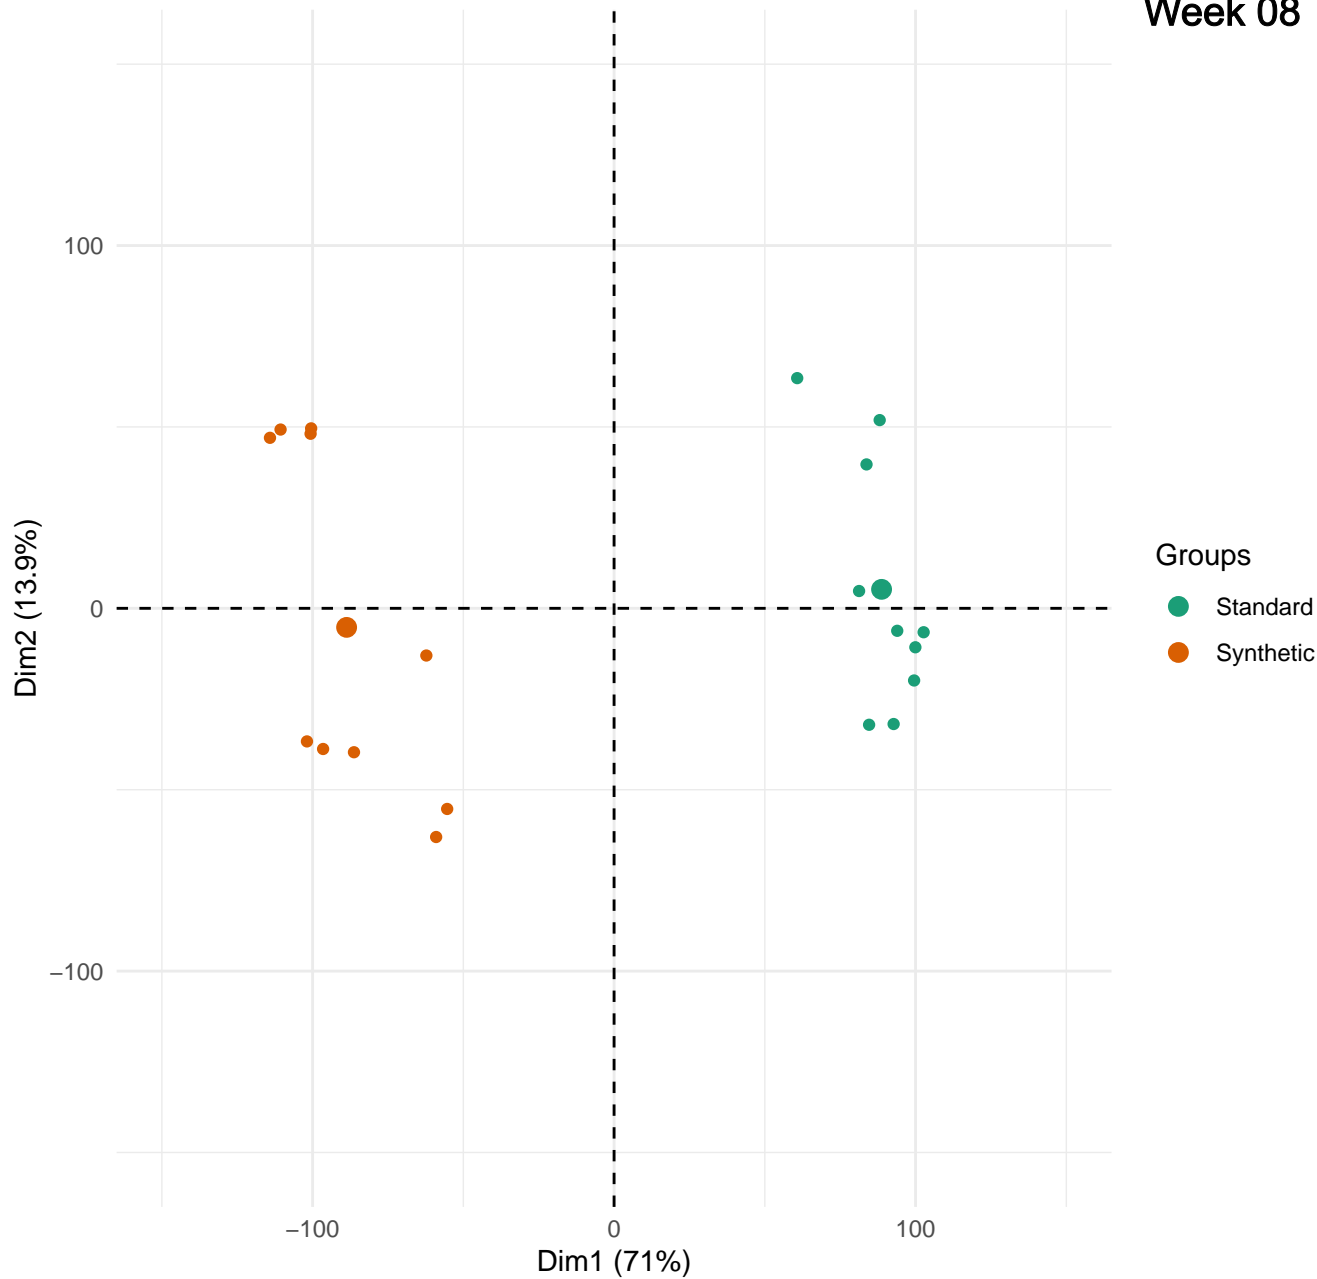

Supplement: s1 [file s1]

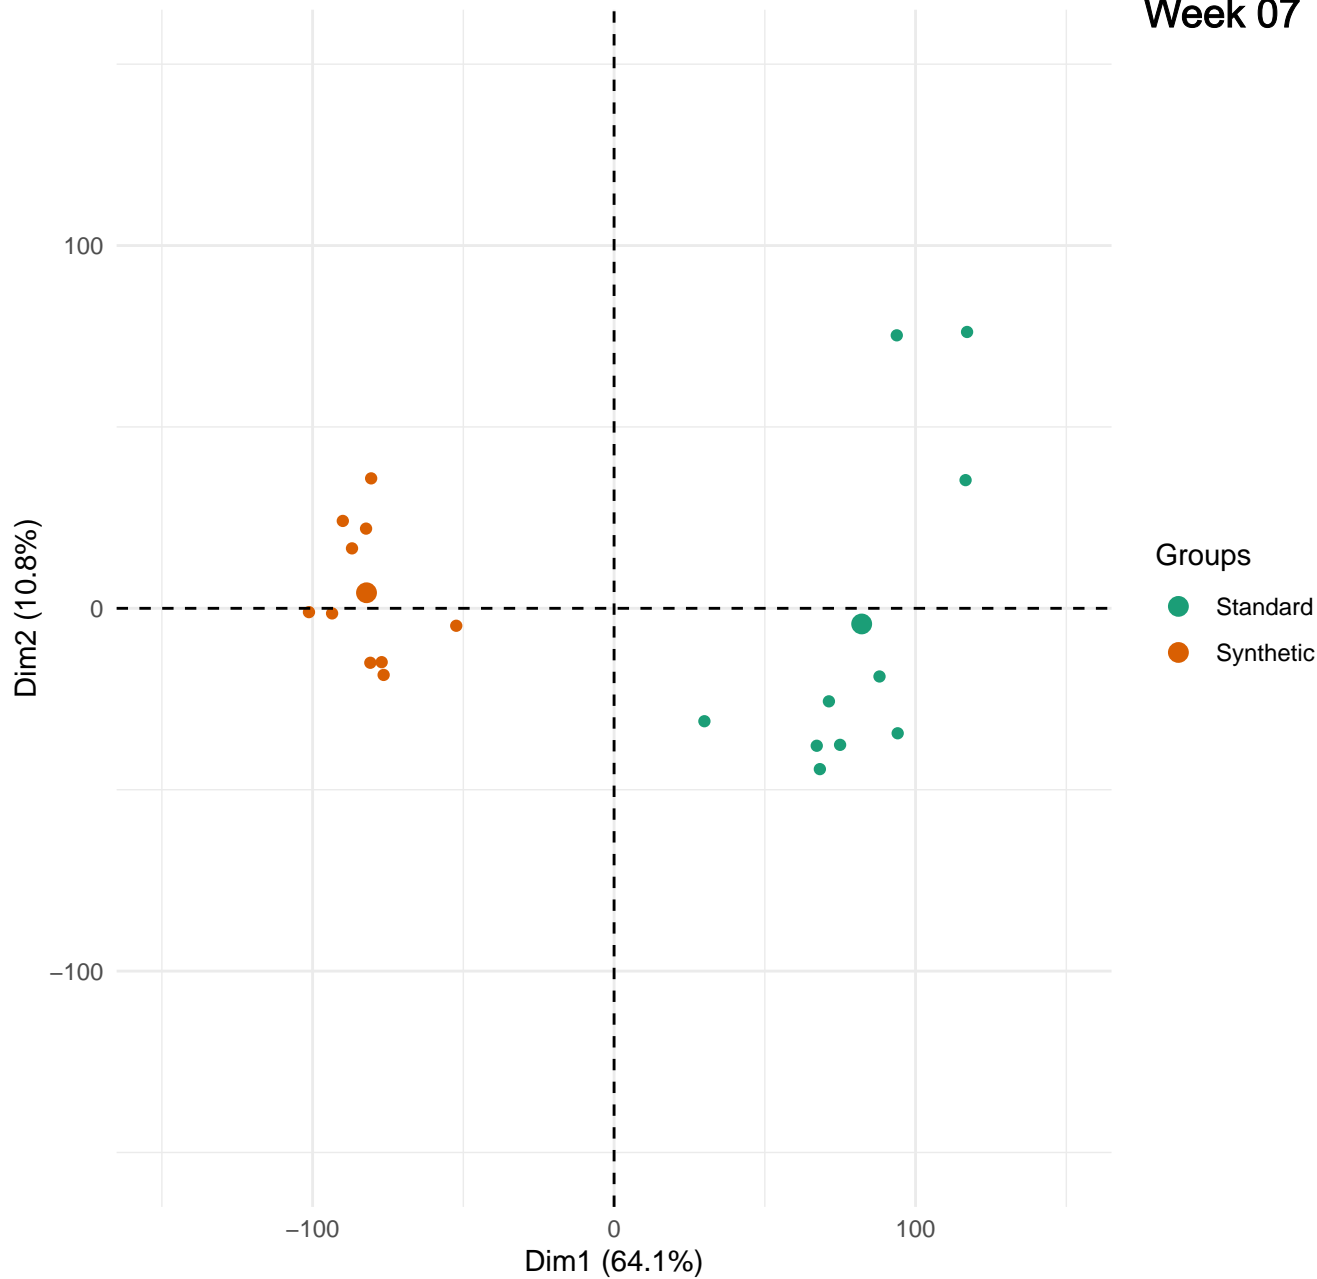

Supplement: s1 [file s1]

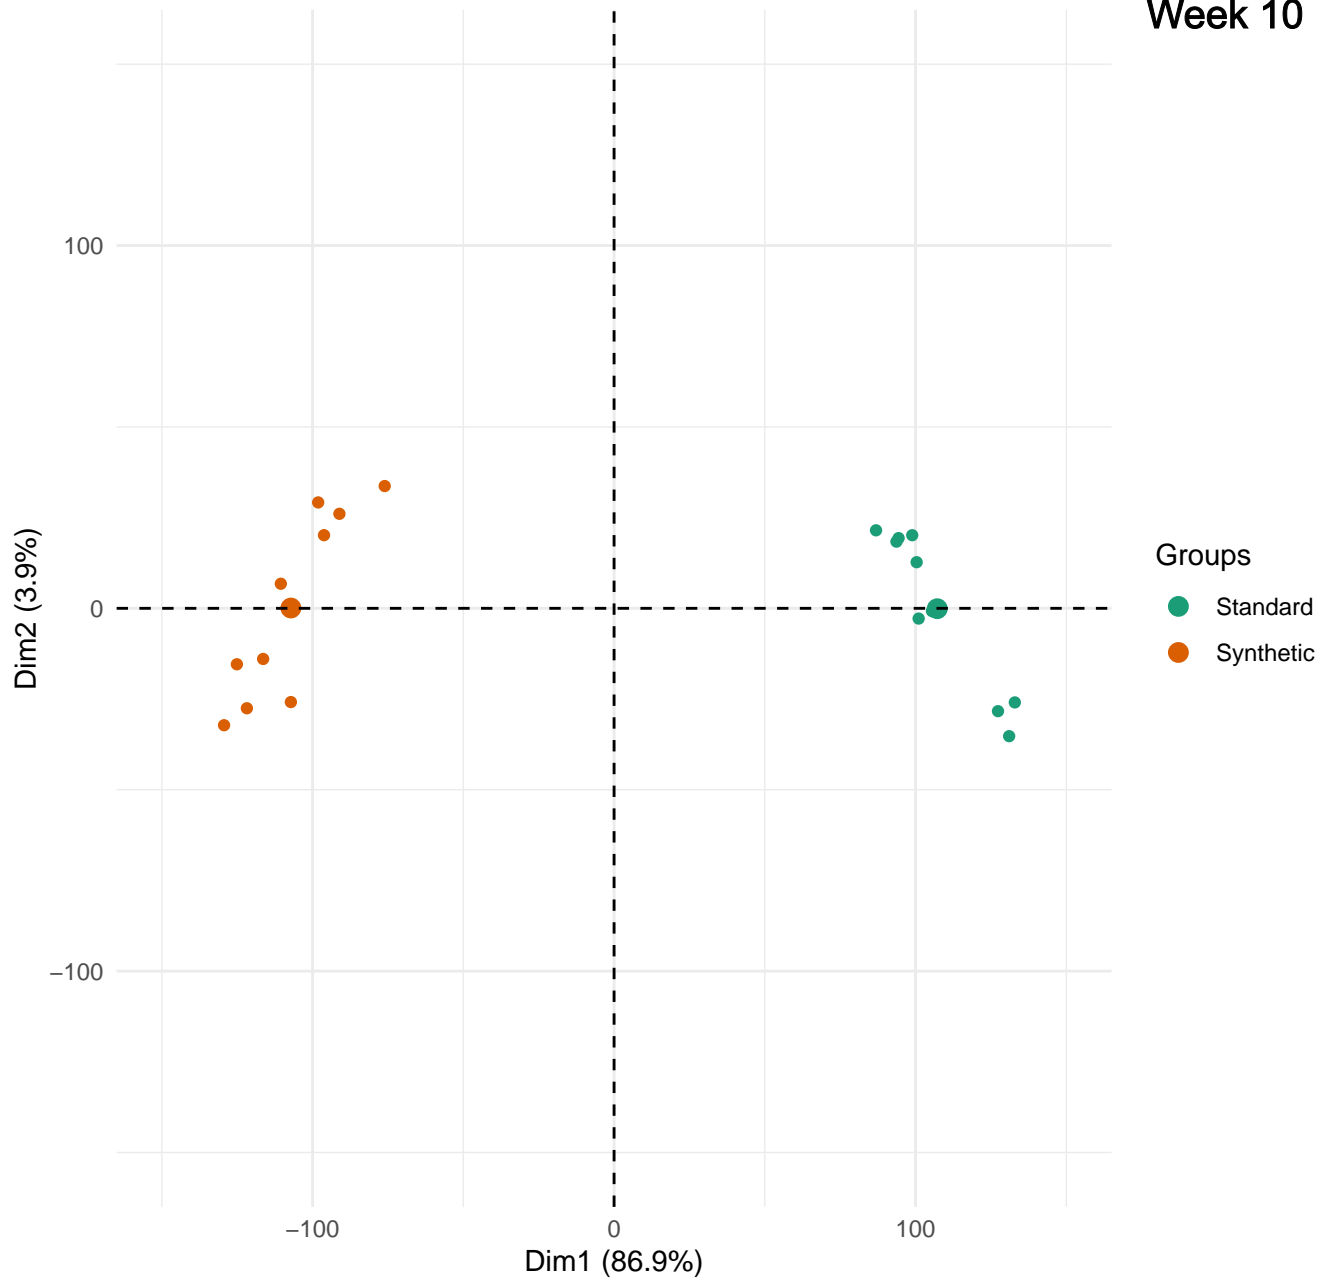

Supplement: s1 [file s1]

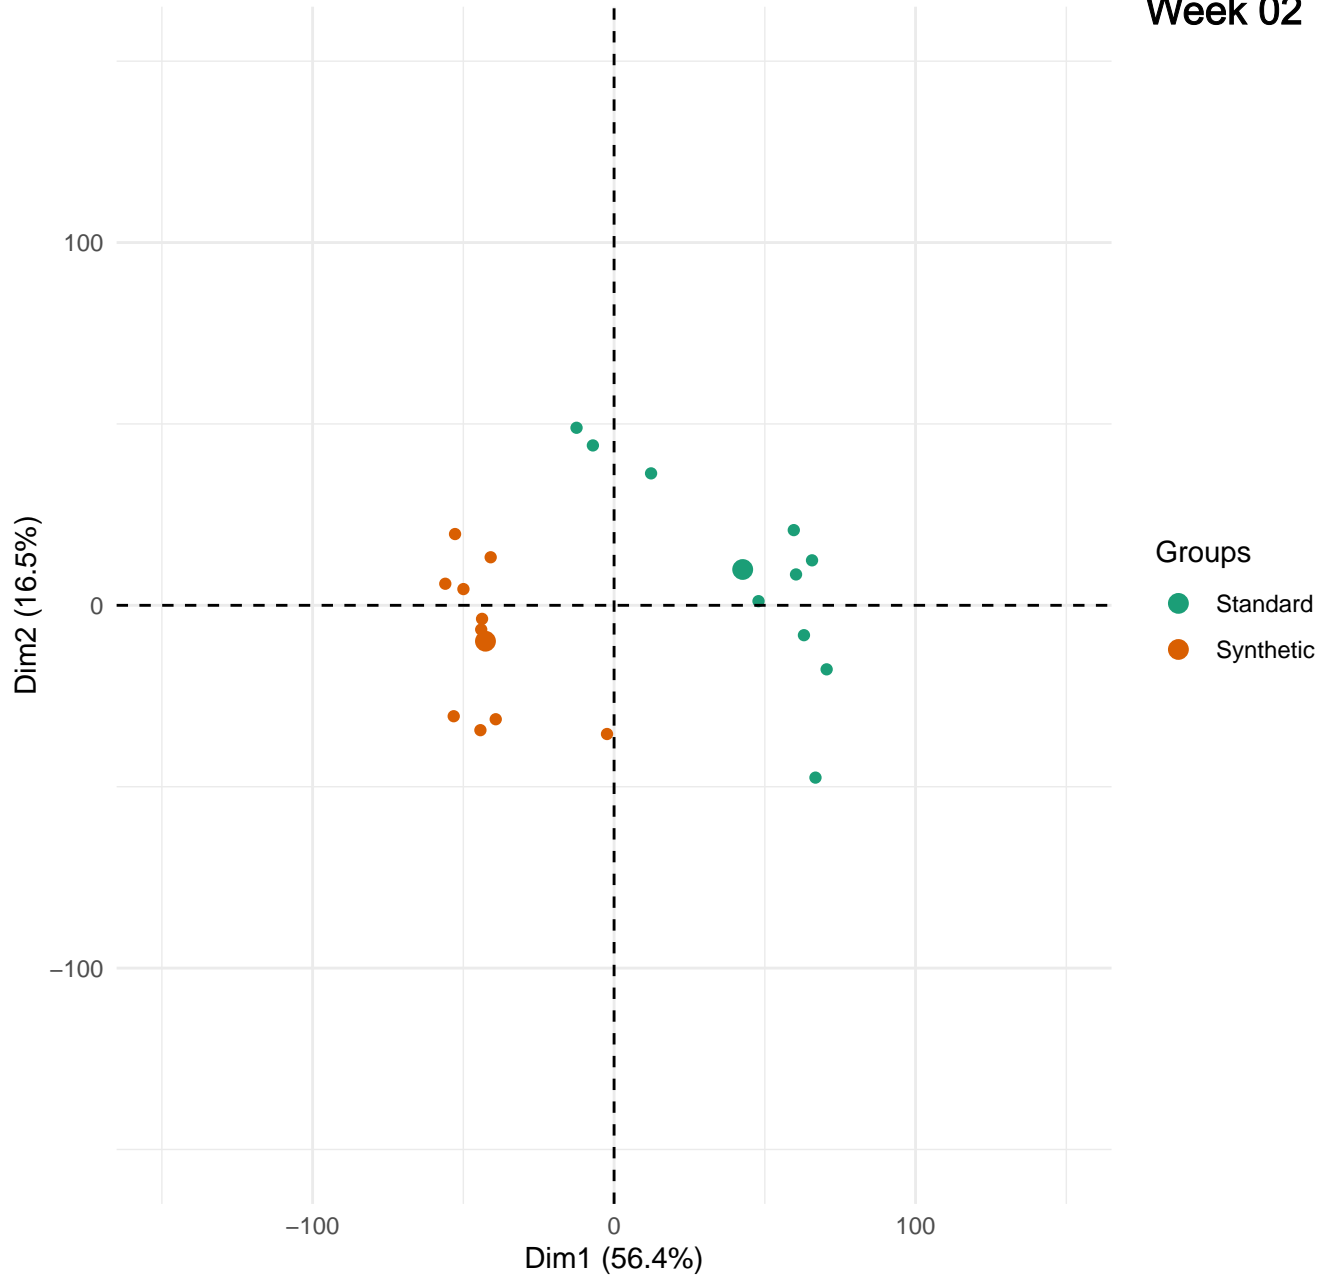

Supplement: s1 [file s1]

Dim2 (13.2%)

Dim1 (61.4%)

Groups

- Standard
- Synthetic

100

0

-100

-100

0

100

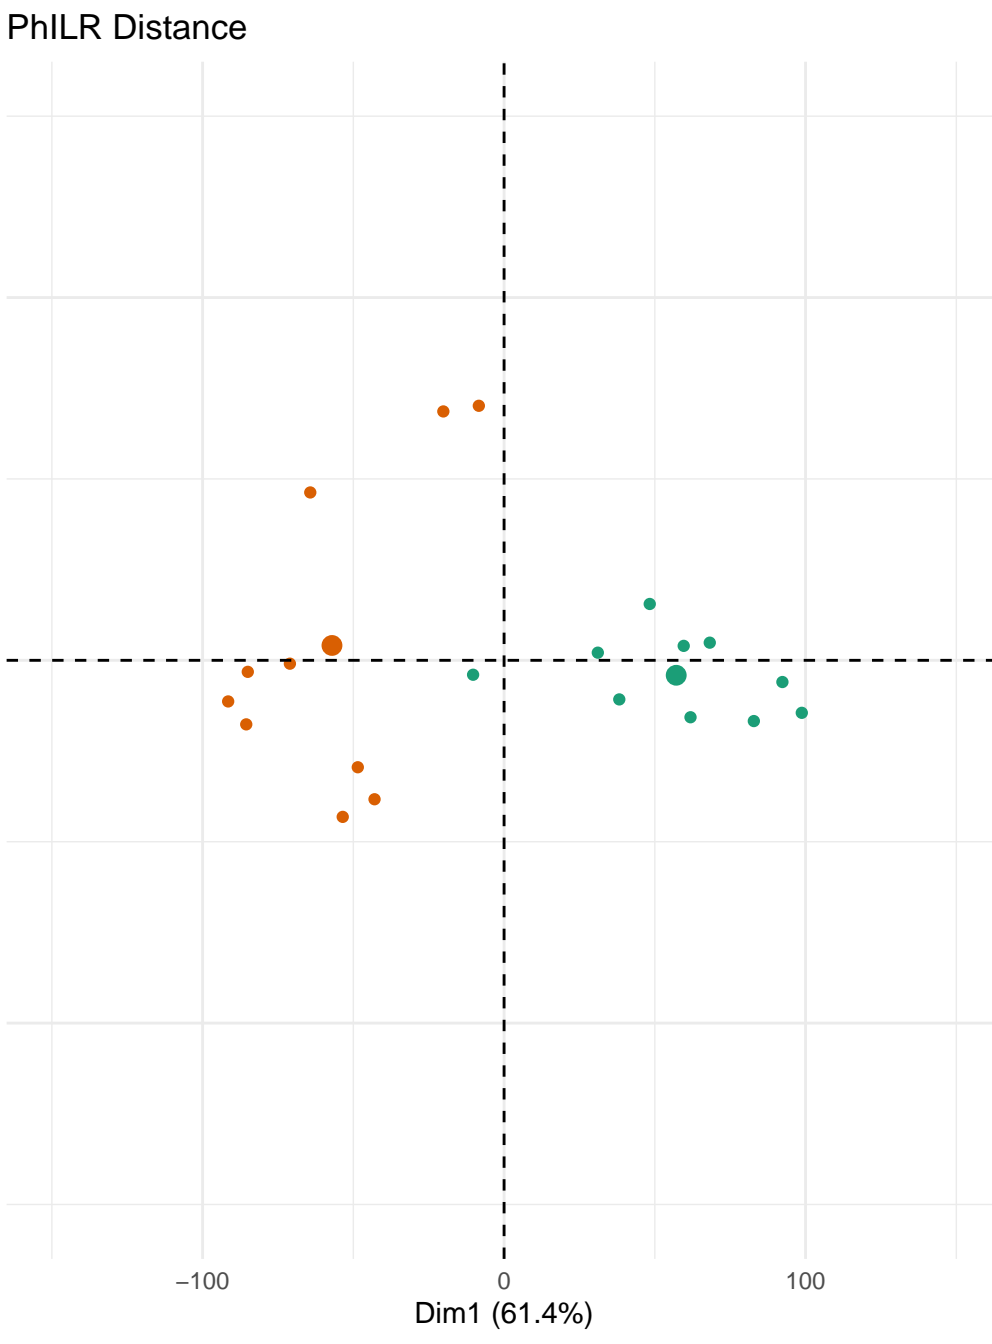

Supplement: s1 [file s1]

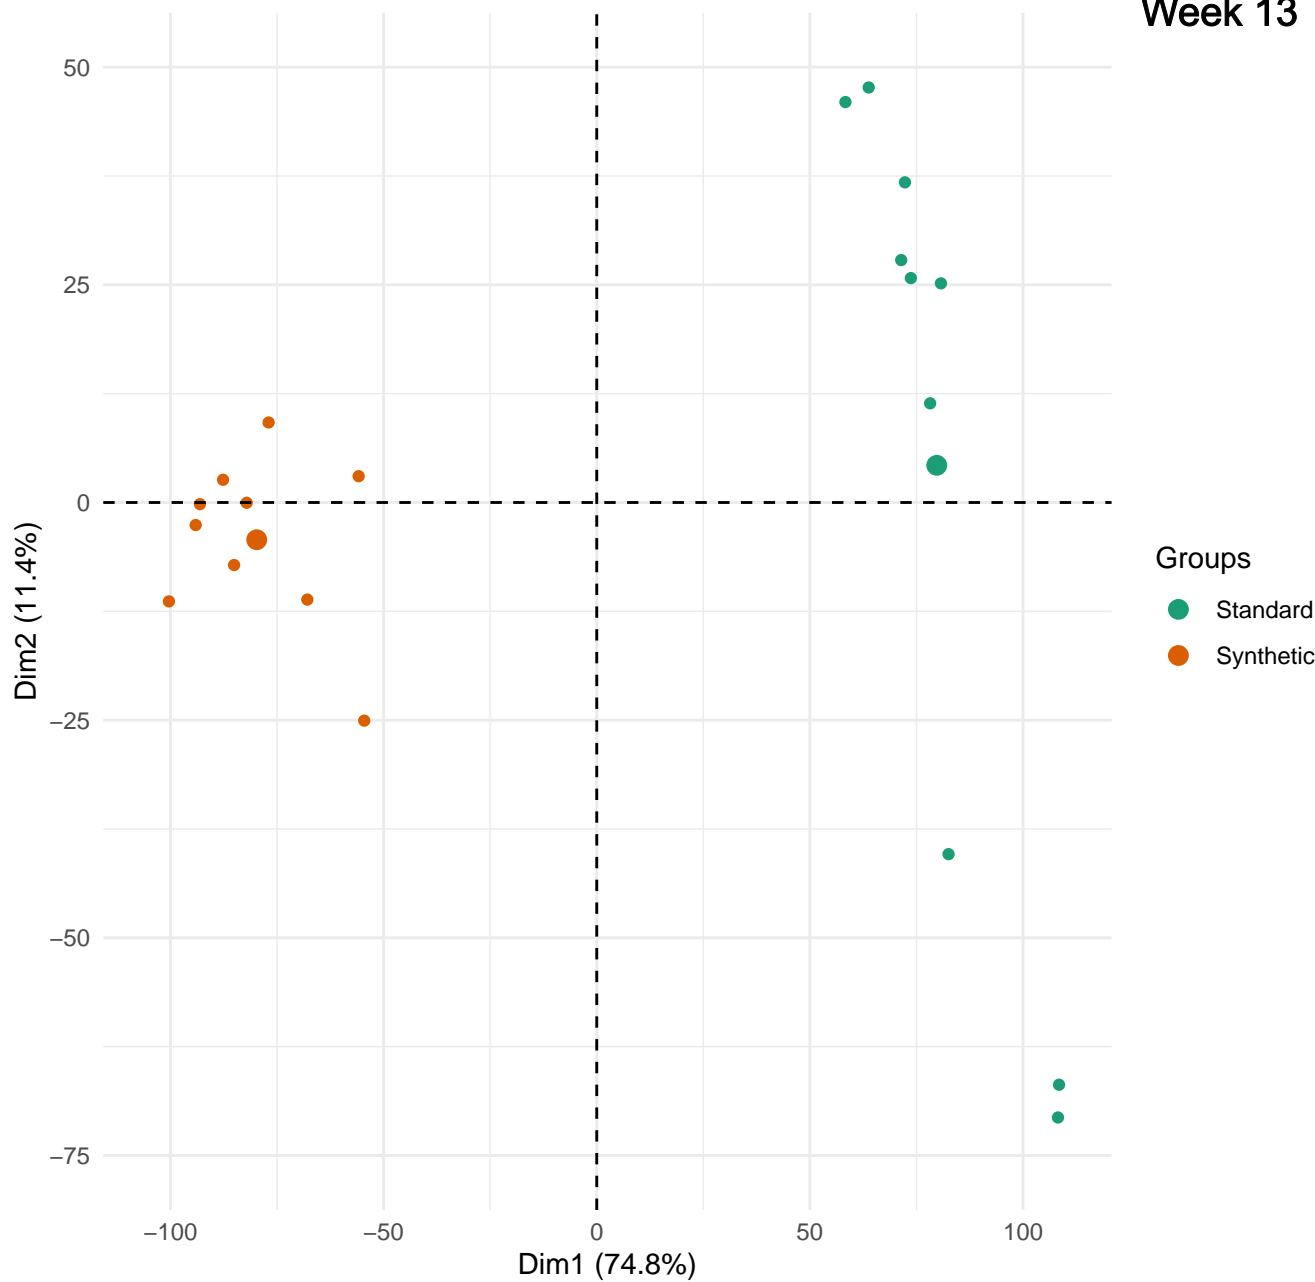

Supplement: s1 [file s1]

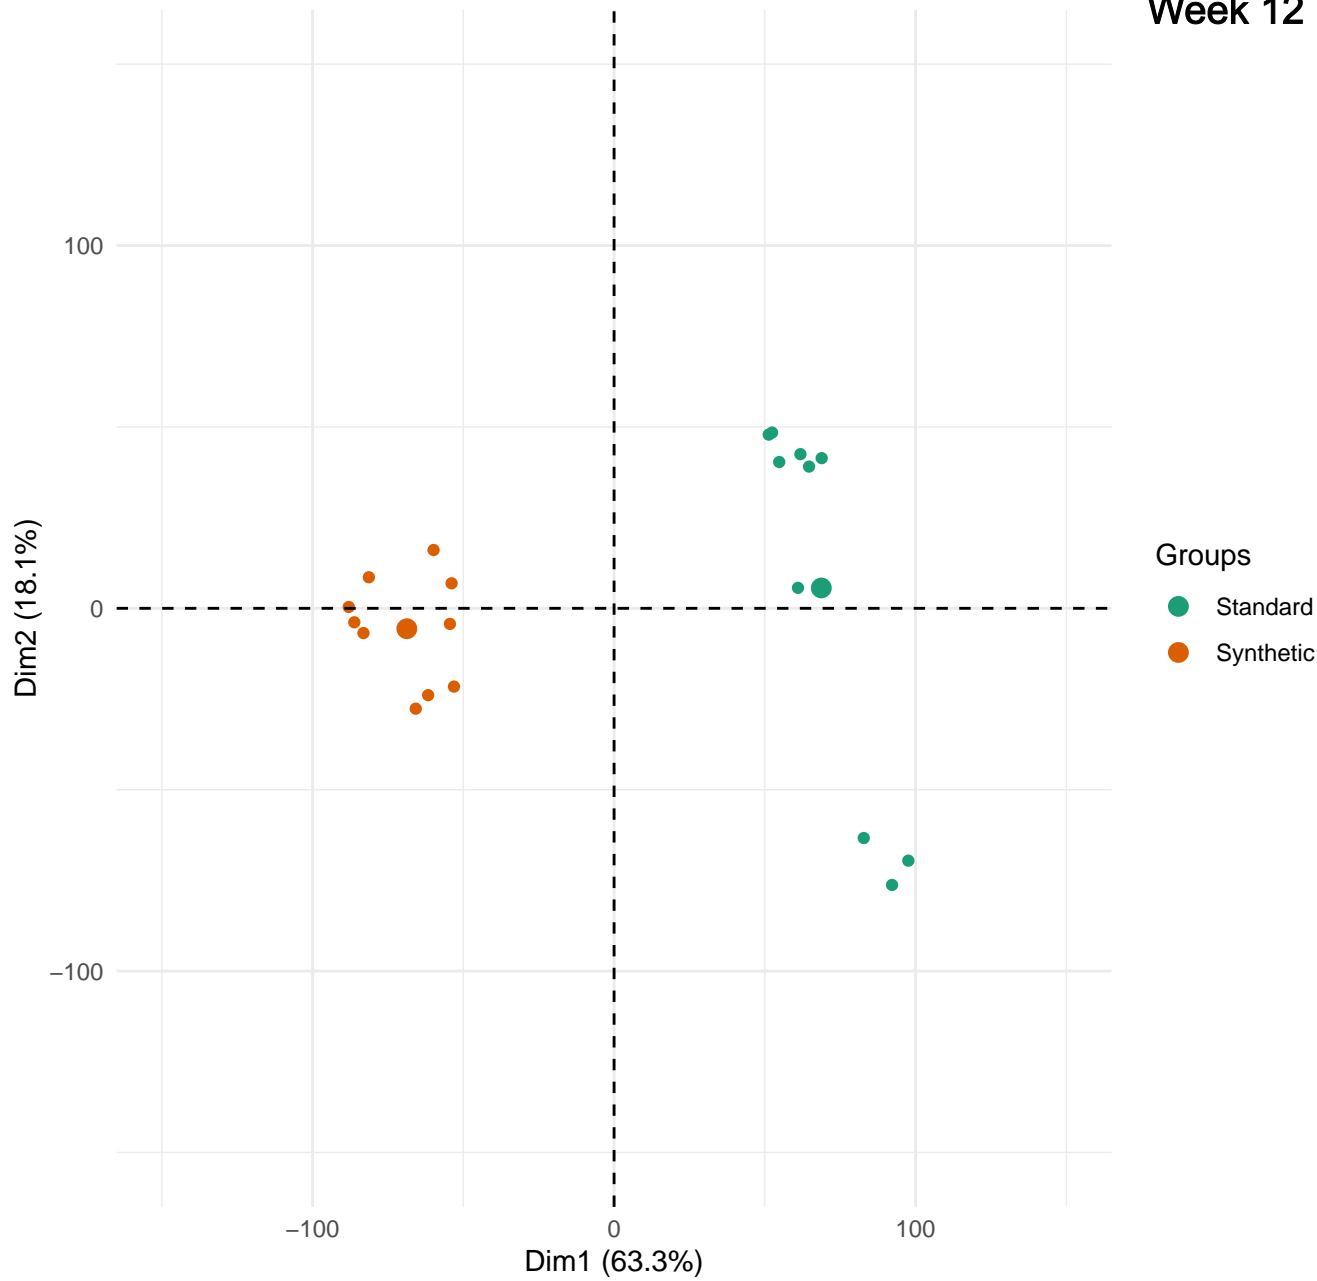

Supplement: s1 [file s1]
